# Supplementary material for: Myeloid cell‐based delivery of IFN‐γ reprograms the leukemia microenvironment and induces anti‐tumoral immune responses
Source: PubMed Central journal article supplement (PMC8495462; doi:10.15252/emmm.202013598), 2021-08-30
Supplement: EMMM-13-e13598-s002.pdf [file EMMM-13-e13598-s002.pdf]

## **Table of content**

**Appendix Figure S1.** IFN $\gamma$  efficacy in a solid tumor model of colorectal carcinoma.

**Appendix Figure S2.** IFN $\gamma$  signature in the myeloid and lymphoid compartments.

**Appendix Figure S3.** Gating strategies for myeloid and lymphoid subpopulations.

**Appendix Table S1.** *In vivo* transplantation of murine lineage negative cells expressing gene of interest under a strong myeloid specific promoter (SP146/gp91).

**Appendix Table S2.** Primers for ddPCR assays.

**Appendix Table S3.** Antibodies utilized for flow cytometry.

**Appendix Table S4.** Statistical analysis of Figure 1 panel A.

**Appendix Table S5.** Statistical analysis of Figure 1 panel I.

**Appendix Table S6.** Statistical analysis of Figure 2 panel C.

**Appendix Table S7.** Statistical analysis of Figure 6 panel C.

**Appendix Table S8.** Statistical analysis of Figure 6 panel E.

**Pathology report from IFN $\gamma$ -engrafted mice.**

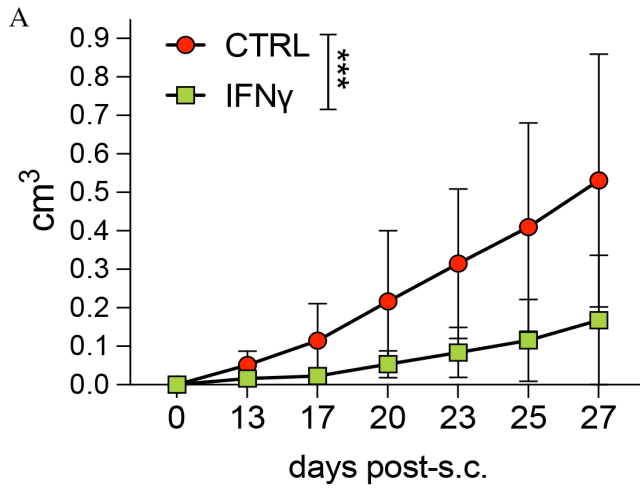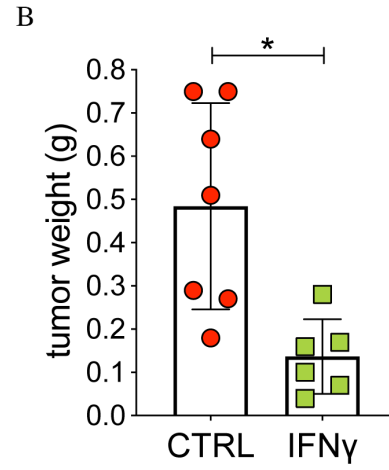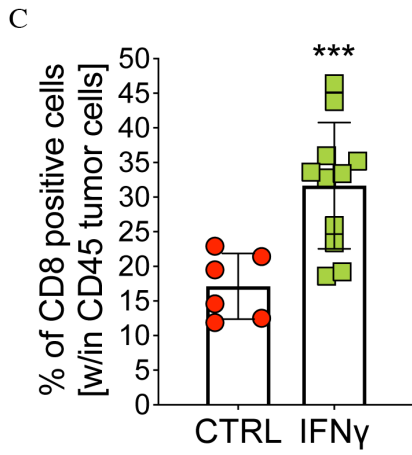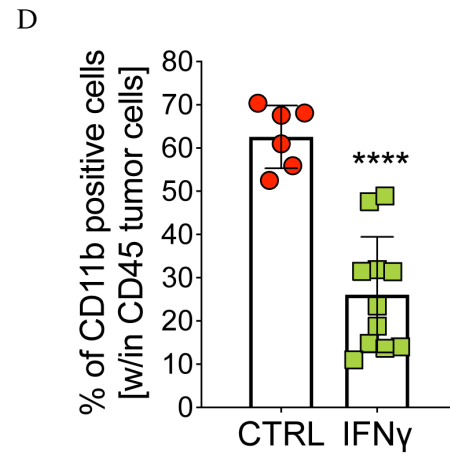

**Appendix Figure S1. IFN $\gamma$  efficacy in a solid tumor model of colorectal carcinoma.**

(A) Tumor volume over-time (one experiment, CTRL = 7 mice, IFN $\gamma$  = 6 mice, mean  $\pm$  SD; \*\*\* $p \leq 0.001$ , Two-Way ANOVA).

(B) Tumor weight at endpoint analysis after resection (mean  $\pm$  SD, each dot represents an individual mouse; \* $p \leq 0.05$ , ordinary One-Way ANOVA).

(C) Percentage of CD8 $^+$  T lymphocytes within CD45 $^+$  hematopoietic cells infiltrating the tumor (mean  $\pm$  SD, each dot represents an individual mouse, 2 independent experiments, \*\*\* $p \leq 0.001$ , ordinary One-Way ANOVA).

(D) Percentage of CD11b $^+$  myeloid cells within CD45 hematopoietic cells infiltrating the tumor (mean  $\pm$  SD, each dot represents an individual mouse, 2 independent experiments, \*\*\*\* $p \leq 0.0001$ , ordinary One-Way ANOVA).

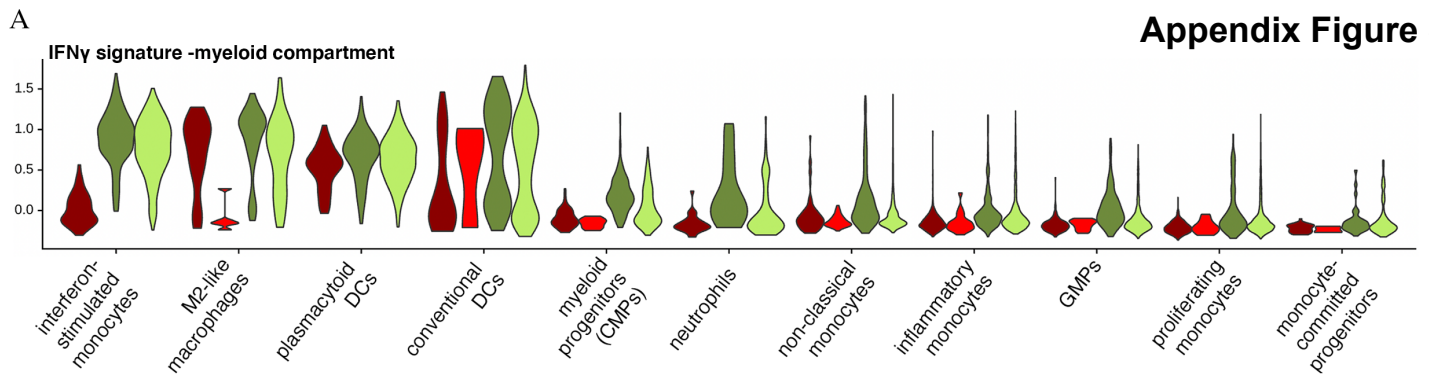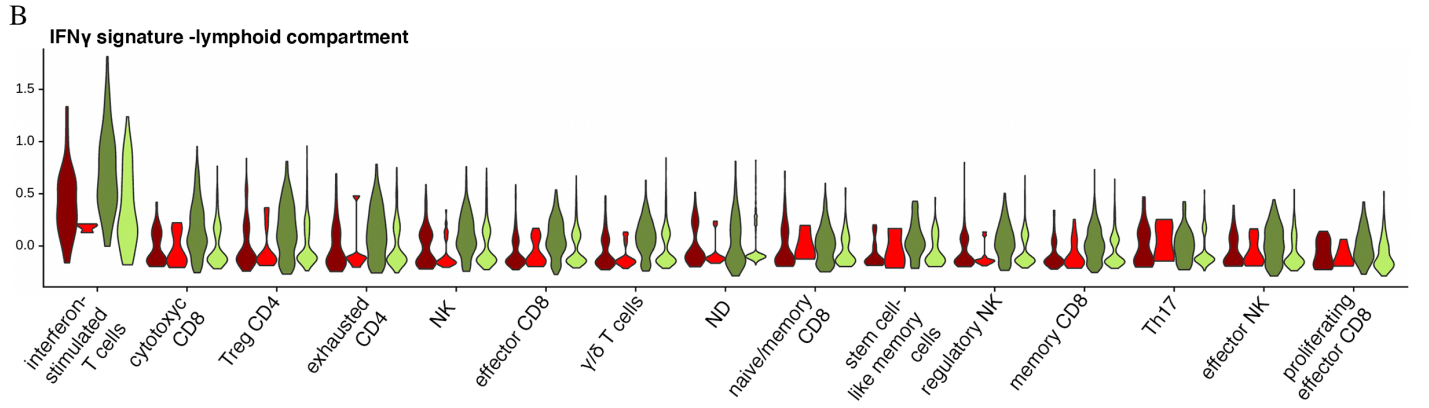



**Appendix Figure S2. IFN $\gamma$  signature in the myeloid and lymphoid compartments.**

(A) Violin plots showing myeloid-specific IFN $\gamma$  gene signature expression (*Stat1*, *Irf1*, *Ido1*, *Ifng*, *Il12a*, *Igtp*, *Ifit1*, *Ifit3*, *H2-Ab1*, *H2-Oa*, *H2-Eb1*, *H2-DMb2*, *H2-Aa*, *H2-DMb1*, *H2-Dma*, *Ciita*) within myeloid cell clusters, derived from the scRNAseq data. Statistics by Wilcoxon Rank Sum Test, IFN $\gamma$  d12 vs. CTRL d12: conventional DCs,  $p = 0.0005$ ; plasmacytoid DCs,  $p = 0.002$ ; T cells  $p = 0.1$ ; interferon stimulated monocytes,  $p = 9 \times 10^{-50}$ ; myeloid progenitors (CMPs),  $p = 8 \times 10^{-14}$ ; proliferating monocytes,  $p = 8 \times 10^{-57}$ ; inflammatory monocytes,  $p = 1.6 \times 10^{-30}$ ; GMPs,  $p = 1.2 \times 10^{-10}$ ; M2-like macrophages,  $p = 0.2$ ; non-classical monocytes,  $p = 6.2 \times 10^{-5}$ ; neutrophils,  $p = 0.0006$ ; monocyte committed progenitors,  $p = 0.0004$ ).

(B) Violin Plots of a lymphoid-specific IFN $\gamma$ -related gene signature (*Irf1*, *Ido1*, *Ifng*, *Il12a*, *Igtp*, *Ifit1*, *Ifit3*) on lymphoid clusters, derived from the scRNAseq data. Statistics by Wilcoxon Rank Sum Test, IFN $\gamma$  d12 vs. CTRL d12:  $\gamma/\delta$  T cells,  $p = 4.3 \times 10^{-11}$ ; cytotoxic CD8,  $p = 0.0004$ ; ND,  $p = 0.17$ ; effector NK,  $p = 0.69$ ; regulatory NK,  $p = 1.6 \times 10^{-6}$ ; proliferating effector CD8,  $p = 0.6$ ; NK,  $p = 1.6 \times 10^{-5}$ ; IFN-stimulated T cells,  $p = 0.4$ ; effector CD8,  $p = 6.9 \times 10^{-11}$ ; stem cell-like memory cells,  $p = 0.002$ ; memory CD8,  $p = 2.7 \times 10^{-8}$ ; Treg CD4,  $p = 0.002$ ; Th17,  $p = 0.6$ ; exhausted CD4,  $p = 0.008$ ; naïve/memory CD8,  $p = 0.6$ ).

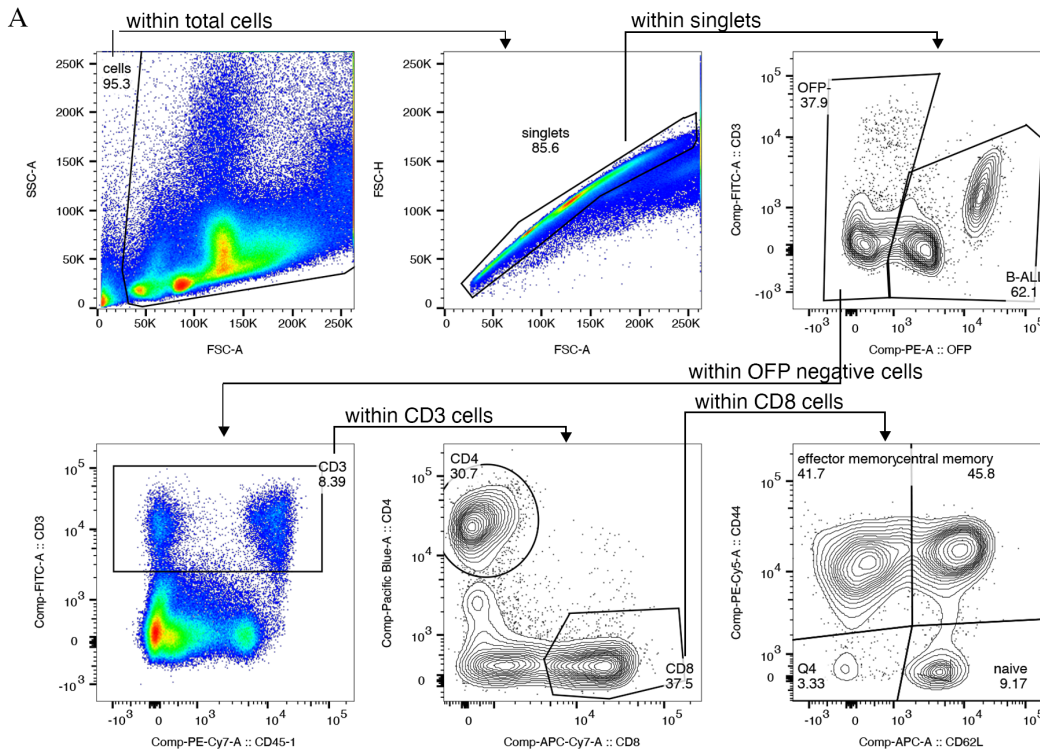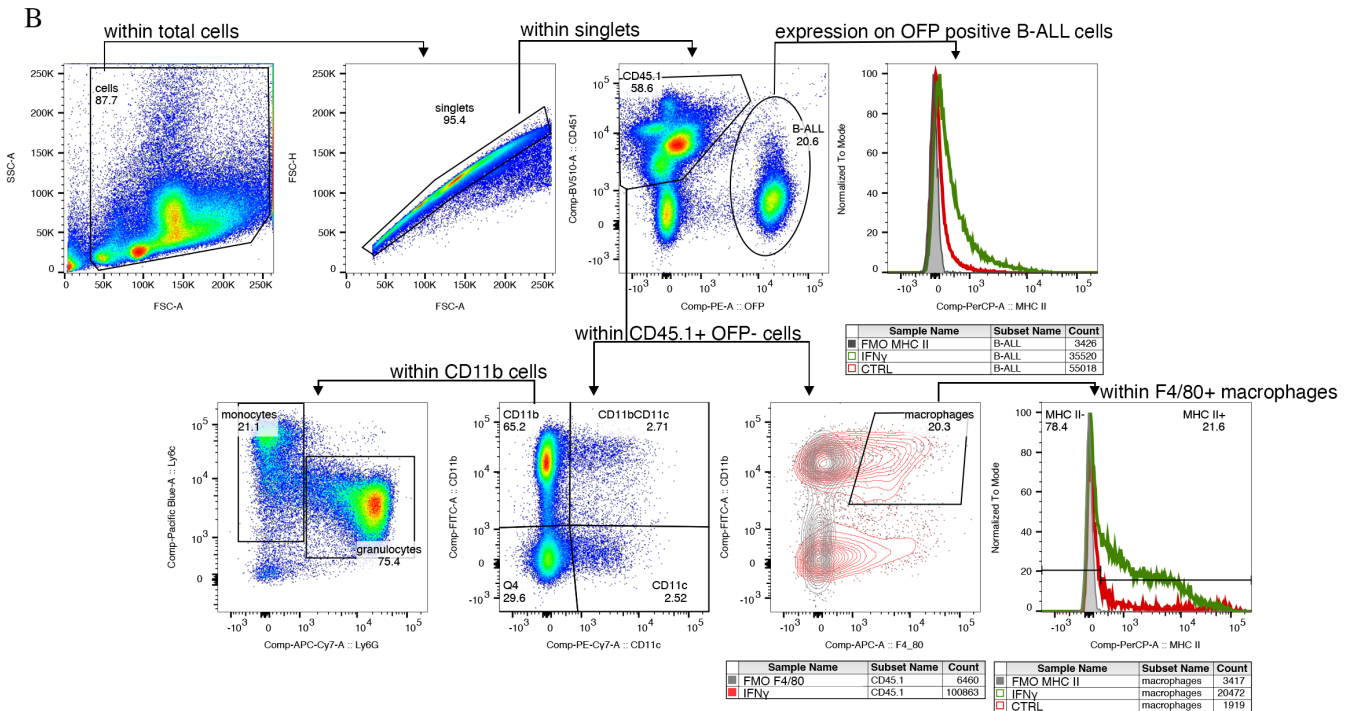

**Appendix Figure S3. Gating strategies for myeloid and lymphoid subpopulations.**

(A) Representative FACS plots showing gating strategy for lymphoid subpopulations

(B) Representative FACS plots showing gating strategy for myeloid subpopulations

Appendix Table S1. In vivo transplantation of murine lineage negative cells expressing gene of interest under a strong myeloid specific promoter (SP146/gp91)

| <b>SP146/gp91phox.NGFR.miRT</b> | <b>SP146/gp91phox.IFN<math>\gamma</math>.miRT</b> |
|---------------------------------|---------------------------------------------------|
| 8 mice                          | 8 mice                                            |
| MOI 50                          | MOI 50                                            |
| cell dose: 500'000/mouse        | cell dose: 500'000/mouse                          |
| VCN <i>in vitro</i> : 3.8       | VCN <i>in vitro</i> : 4.05                        |
| VCN <i>in vivo</i> (BM): 5.32   | VCN <i>in vivo</i> (BM) : 3.45                    |

Appendix Table S2.

Primers for ddPCR assays.

| TARGET       |         | SEQUENCE                                      |
|--------------|---------|-----------------------------------------------|
| HIV          | Forward | 5'-TACTGACGCTCTCGCACC-3'                      |
|              | Probe   | FAM 5'-ATCTCTCTCCTTCTAGCCTC-3'                |
|              | Reverse | 5'-TCTCGACGCAGGACTCG-3'                       |
| Tie2         | Forward | 5'- CTGTGGTGTTCCTCCTTG-3'                     |
| IFN $\alpha$ | Probe   | FAM 5'-TGATGGTCCTGGCGGTGCTGAGCT-3' BHQ2       |
|              | Reverse | 5'-GAGGTTATGAGTCTGAGG-3'                      |
| IFN $\gamma$ | Probe   | FAM 5'-TGGCTGTACTGCCACGGCACAGT-3' BHQ2        |
|              | Reverse | 5'-CTCCACATCTATGCCAC-3'                       |
| TNF $\alpha$ | Probe   | FAM 5'-CACCATGAGCACAGAAAGCATGATCCGCGA-3' BHQ2 |
|              | Reverse | 5'-GAAGAGGCTGAGACATAG-3'                      |
| Sema3a       | Forward | 5'-ACCGATTCCAGATGATTGGC-3'                    |
|              | Probe   | HEX 5'-AGAGGCCTGTCTGCAGCTCATGG-3' BHQ1        |
|              | Reverse | 5'-TCCATATTAATGCAGTGCTTGC-3'                  |

Appendix Table S3. Antibodies utilized for flow cytometry.

| antigen       | name                                                            | color         | clone        | catalog #   | company                  | dilution |
|---------------|-----------------------------------------------------------------|---------------|--------------|-------------|--------------------------|----------|
| CD16/CD32     | Purified Rat Anti-Mouse CD16/CD32 (Mouse BD Fc Block)           | purified      | 2.4G2        | 553142      | BD Biosciences           | 1 : 100  |
| CD45          | Anti-Mo CD45, eBioscience                                       | APC           | 30-F11       | 17-0451-82  | Thermo Fisher Scientific | 1 : 100  |
| CD45.1        | eBioscience Anti-Mouse CD45.1                                   | APC           | A20          | 17-0453-82  | Thermo Fisher Scientific | 1 : 100  |
| CD45.1        | eBioscience Anti-Mouse CD45.1                                   | FITC          | A20          | 11-0453-82  | Thermo Fisher Scientific | 1 : 100  |
| CD45.1        | Brilliant Violet 510 anti-mouse CD45.1                          | BV510         | A20          | 110741      | BioLegend                | 1 : 100  |
| CD45.1        | PE Mouse Anti-Mouse Cd45.1                                      | PE            | A20          | 553776      | BD Biosciences           | 1 : 100  |
| CD45.1        | PE/Cy7 anti-mouse CD45.1                                        | PE/Cy7        | A20          | 110730      | BioLegend                | 1 : 100  |
| CD45.2        | Pacific Blue anti-Mouse CD45.2                                  | Pacific Blue  | 104          | 109820      | BioLegend                | 1 : 100  |
| CD45.2        | eBioscience Anti-Mouse CD45.2                                   | PE            | 104          | 12-0454-82  | Thermo Fisher Scientific | 1 : 100  |
| CD45.2        | Brilliant Violet 510 anti-mouse CD45.2                          | BV510         | 104          | 109838      | BioLegend                | 1 : 100  |
| CD45.2        | eBioscience Anti-Mouse CD45.2                                   | FITC          | 104          | 11-0454-82  | Thermo Fisher Scientific | 1 : 100  |
| CD19          | Anti-Mouse CD19                                                 | APC           | eBio1D3      | 17-0193-82  | Thermo Fisher Scientific | 1 : 100  |
| CD19          | Brilliant Violet 510 anti-mouse CD19                            | BV510         | 6D5          | 115545      | BioLegend                | 1 : 100  |
| CD19          | PE/Cy7 anti-mouse CD19                                          | PE/Cy7        | 6D5          | 115520      | BioLegend                | 1 : 100  |
| CD19          | PE Rat Anti-Mouse CD19                                          | PE            | 1D3          | 553786      | BD Biosciences           | 1 : 100  |
| CD3e          | eBioscience Anti-Mouse CD3e                                     | PE            | 145-2C11     | 12-0031-81  | Thermo Fisher Scientific | 1 : 100  |
| CD3e          | eBioscience Anti-Mouse CD3e                                     | FITC          | 145-2C11     | 11-0031-82  | Thermo Fisher Scientific | 1 : 100  |
| CD4           | Anti-Mouse CD4 eBioscience                                      | eFluo450      | RM4-5        | 48-0042-82  | Thermo Fisher Scientific | 1 : 200  |
| CD4           | Anti-Mouse CD4 eBioscience                                      | AlexaFluor700 | GK1.5        | 56-0041-80  | Thermo Fisher Scientific | 1 : 100  |
| CD4           | Anti-Mouse CD4 eBioscience                                      | APC           | GK1.5        | 17-0041-82  | Thermo Fisher Scientific | 1 : 100  |
| CD8a          | CD8a/Ly-2 Rt Anti-Ms mAb                                        | APC/Cy7       | 53-6.7       | A15386      | Life Technologies        | 1 : 100  |
| CD8a          | Brilliant Violet 510 Anti-Mouse CD8a                            | BV510         | 53-6.7       | 100751      | BioLegend                | 1 : 200  |
| CD11b         | FITC Rat Anti-Mouse CD11b                                       | FITC          | M1/70        | 553310      | BD Biosciences           | 1 : 100  |
| CD11b         | PE-Cy7 Rat Anti-CD11b                                           | PE/Cy7        | M1/70        | 561098      | BD Biosciences           | 1 : 100  |
| CD11b         | APC/Cyanine7 anti-mouse/human CD11b                             | APC/Cy7       | M1/70        | 101226      | BioLegend                | 1 : 100  |
| CD11b         | PE Rat Anti-Mouse CD11b                                         | PE            | M1/70        | 553311      | BD Biosciences           | 1 : 100  |
| CD11c         | eBioscience Anti-Mouse CD11c                                    | eFluo450      | N418         | 48-0114-82  | Thermo Fisher Scientific | 1 : 100  |
| CD11c         | FITC Hamster Anti-Mouse CD11c                                   | FITC          | HL3          | 557400      | BD Biosciences           | 1 : 100  |
| CD150         | Brilliant Violet 510™ anti-mouse CD150 (SLAM) Antibody          | BV510         | TC15-12F12.2 | 115929      | BioLegend                | 1 : 100  |
| CD34          | PE anti-mouse CD34 Antibody                                     | PE            | MEC14.7      | 119307      | BioLegend                | 1 : 100  |
| CD44          | PE-Cy5 Rat Anti-Mouse CD44                                      | PE/Cy5        | IM7          | 561861      | BD Biosciences           | 1 : 200  |
| CD62L         | APC Anti-Mouse CD62L                                            | APC           | MEL-14       | 104412      | BioLegend                | 1 : 100  |
| CD103         | BV711 Rat Anti-Mouse CD103                                      | BV711         | M290         | 564320      | BD Biosciences           | 1 : 100  |
| MHC II        | Brilliant Violet 510 anti-mouse I-A/I-E                         | BV510         | M5/114.15.2  | 107635      | BioLegend                | 1 : 100  |
| MHC II        | PerCP-Cy5.5 Rat Anti-Mouse I-A/I-E                              | PerCP/Cy5.5   | M5/114.15.2  | 562363      | BD Biosciences           | 1 : 100  |
| PD-1          | PE-CF594 Hamster Anti-Mouse CD279                               | PE-CF594      | J43          | 562523      | BD Biosciences           | 1 : 100  |
| LAG-3         | PerCP-Cy5.5 Rat Anti-Mouse CD223                                | PerCP/Cy5.5   | C9B7W        | 564673      | BD Biosciences           | 1 : 100  |
| CD25          | eBioscience Anti-Mouse CD25                                     | PE/Cy7        | PC61.5       | 25-0251-82  | Thermo Fisher Scientific | 1 : 100  |
| Ly6G          | APC-Cy7 Rat Anti-Mouse Ly-6G                                    | APC/Cy7       | 1A8          | 560600      | BD Biosciences           | 1 : 200  |
| Ly6C          | Anti-Mo Ly-6C eBioscience                                       | eFluo450      | HK1.4        | 48-5932-82  | Thermo Fisher Scientific | 1 : 200  |
| LNGFR (CD271) | PE-Vio770, Human                                                | PE-Vio770     | ME20.4-1-H4  | 130-113-422 | Miltenyi Biotec          | 1 : 100  |
| LNGFR (CD271) | BV510 Mouse Anti-Human CD271                                    | BV510         | C40-1457     | 563451      | BD Biosciences           | 1 : 100  |
| Lin+ cocktail | Anti-Mouse Hematopoietic Lineage Antibody Cocktail, eBioscience | eFluo450      |              | 88-7772-72  | Thermo Fisher Scientific | 1 : 100  |
| c-Kit         | APC Rat Anti-Mouse CD117                                        | APC           | 2B8          | 553356      | BD Biosciences           | 1 : 100  |
| Sca-1         | PE-Cy7 Rat Anti-Mouse Ly-6A/E                                   | PE/Cy7        | D7           | 558162      | BD Biosciences           | 1 : 100  |
| F4/80         | Rat Anti-Mouse F4/80: RPE                                       | RPE           | Cl:A3-1      | MCA497PE    | BioRad                   | 1 : 100  |
| F4/80         | Rat Anti-Mouse F4/80: APC                                       | APC           | Cl:A3-1      | MCA497APC   | BioRad                   | 1 : 100  |
| CD19          | FITC Mouse Anti-Human CD19                                      | FITC          | HIB19 (RUO)  | 555412      | BD Biosciences           | 2 : 100  |
| CD33          | CD33-VioBlue, human for 100 tests                               | VioBlue       | REA775       | 130-111-024 | Miltenyi Biotec          | 2 : 100  |

Appendix Table S4

Figure 1A

| Compare each cell mean with the other cell mean in that row |           |                           |                       |                           |             |                  |    |         |       |
|-------------------------------------------------------------|-----------|---------------------------|-----------------------|---------------------------|-------------|------------------|----|---------|-------|
| <b>Number of families</b>                                   |           | 1                         |                       |                           |             |                  |    |         |       |
| <b>Number of comparisons per family</b>                     |           | 4                         |                       |                           |             |                  |    |         |       |
| <b>Alpha</b>                                                |           | 0.05                      |                       |                           |             |                  |    |         |       |
| <b>Šídák's multiple comparisons test</b>                    |           | Predicted (LS) mean diff. | 95.00% CI of diff.    | Below threshold?          | Summary     | Adjusted P Value |    |         |       |
| <b>CTRL - IFN<math>\gamma</math></b>                        |           |                           |                       |                           |             |                  |    |         |       |
|                                                             | <b>10</b> | 81.93                     | -15280 to 15444       | No                        | ns          | >0.9999          |    |         |       |
|                                                             | <b>12</b> | 3815                      | -11547 to 19177       | No                        | ns          | 0.9479           |    |         |       |
|                                                             | <b>14</b> | 10132                     | -9071 to 29334        | No                        | ns          | 0.5425           |    |         |       |
|                                                             | <b>17</b> | 71777                     | 52574 to 90979        | Yes                       | ****        | <0.0001          |    |         |       |
| <b>Test details</b>                                         |           | Predicted (LS) mean 1     | Predicted (LS) mean 2 | Predicted (LS) mean diff. | SE of diff. | N1               | N2 | t       | DF    |
| <b>CTRL - IFN<math>\gamma</math></b>                        |           |                           |                       |                           |             |                  |    |         |       |
|                                                             | <b>10</b> | 96.37                     | 14.44                 | 81.93                     | 5915        | 6                | 10 | 0.01385 | 44.00 |
|                                                             | <b>12</b> | 4109                      | 293.7                 | 3815                      | 5915        | 6                | 10 | 0.6449  | 44.00 |
|                                                             | <b>14</b> | 16187                     | 6056                  | 10132                     | 7394        | 4                | 6  | 1.370   | 44.00 |
|                                                             | <b>17</b> | 108472                    | 36695                 | 71777                     | 7394        | 4                | 6  | 9.707   | 44.00 |

| Compare each cell mean with the other cell mean in that row. |           |            |                           |              |             |                  |    |           |    |
|--------------------------------------------------------------|-----------|------------|---------------------------|--------------|-------------|------------------|----|-----------|----|
| <b>Number of families</b>                                    |           | 1          |                           |              |             |                  |    |           |    |
| <b>Number of comparisons per family</b>                      |           | 3          |                           |              |             |                  |    |           |    |
| <b>Alpha</b>                                                 |           | 0,05       |                           |              |             |                  |    |           |    |
| <b>Sidak's multiple comparisons test</b>                     |           | Mean Diff. | 95% CI of diff.           | Significant? | Summary     | Adjusted P Value |    |           |    |
| <b>CTRL - IFN<math>\gamma</math></b>                         |           |            |                           |              |             |                  |    |           |    |
|                                                              | <b>14</b> | 1101       | -1.577e+007 to 1.577e+007 | No           | ns          | > 0.9999         |    |           |    |
|                                                              | <b>16</b> | 479277     | -1.529e+007 to 1.625e+007 | No           | ns          | 0,9998           |    |           |    |
|                                                              | <b>19</b> | 4.264E+10  | 2.687e+007 to 5.841e+007  | Yes          | ****        | < 0.0001         |    |           |    |
| <b>Test details</b>                                          |           | Mean 1     | Mean 2                    | Mean Diff.   | SE of diff. | N1               | N2 | t         | DF |
| <b>CTRL - IFN<math>\gamma</math></b>                         |           |            |                           |              |             |                  |    |           |    |
|                                                              | <b>14</b> | 16124      | 15023                     | 1101         | 6.389E+09   | 9                | 10 | 0,0001723 | 51 |
|                                                              | <b>16</b> | 1.053E+09  | 573336                    | 479277       | 6.389E+09   | 9                | 10 | 0,07502   | 51 |
|                                                              | <b>19</b> | 8.404E+10  | 4.14E+10                  | 4.264E+10    | 6.389E+09   | 9                | 10 | 6,674     | 51 |



Figure 2C

| Within each row, compare columns (simple effects within rows) |            |                    |                  |             |                  |    |           |       |
|---------------------------------------------------------------|------------|--------------------|------------------|-------------|------------------|----|-----------|-------|
| Number of families                                            | 3          |                    |                  |             |                  |    |           |       |
| Number of comparisons per family                              | 6          |                    |                  |             |                  |    |           |       |
| Alpha                                                         | 0.05       |                    |                  |             |                  |    |           |       |
| Tukey's multiple comparisons test                             | Mean Diff. | 95.00% CI of diff. | Below threshold? | Summary     | Adjusted P Value |    |           |       |
|                                                               |            |                    |                  |             |                  |    |           |       |
| <b>7</b>                                                      |            |                    |                  |             |                  |    |           |       |
| WT CTRL vs. KO CTRL                                           | -14.97     | -6918 to 6888      | No               | ns          | >0.9999          |    |           |       |
| WT CTRL vs. WT IFN $\gamma$                                   | 7.008      | -6896 to 6910      | No               | ns          | >0.9999          |    |           |       |
| WT CTRL vs. KO IFN $\gamma$                                   | -13.72     | -6917 to 6890      | No               | ns          | >0.9999          |    |           |       |
| KO CTRL vs. WT IFN $\gamma$                                   | 21.98      | -6881 to 6925      | No               | ns          | >0.9999          |    |           |       |
| KO CTRL vs. KO IFN $\gamma$                                   | 1.254      | -6902 to 6905      | No               | ns          | >0.9999          |    |           |       |
| WT IFN $\gamma$ vs. KO IFN $\gamma$                           | -20.73     | -6924 to 6883      | No               | ns          | >0.9999          |    |           |       |
|                                                               |            |                    |                  |             |                  |    |           |       |
| <b>10</b>                                                     |            |                    |                  |             |                  |    |           |       |
| WT CTRL vs. KO CTRL                                           | -2404      | -9307 to 4500      | No               | ns          | 0.7965           |    |           |       |
| WT CTRL vs. WT IFN $\gamma$                                   | 3457       | -3446 to 10360     | No               | ns          | 0.5552           |    |           |       |
| WT CTRL vs. KO IFN $\gamma$                                   | -4020      | -10923 to 2884     | No               | ns          | 0.4243           |    |           |       |
| KO CTRL vs. WT IFN $\gamma$                                   | 5861       | -1043 to 12764     | No               | ns          | 0.1242           |    |           |       |
| KO CTRL vs. KO IFN $\gamma$                                   | -1616      | -8520 to 5287      | No               | ns          | 0.9268           |    |           |       |
| WT IFN $\gamma$ vs. KO IFN $\gamma$                           | -7477      | -14380 to -573.3   | Yes              | *           | 0.0286           |    |           |       |
|                                                               |            |                    |                  |             |                  |    |           |       |
| <b>12</b>                                                     |            |                    |                  |             |                  |    |           |       |
| WT CTRL vs. KO CTRL                                           | -11786     | -18690 to -4883    | Yes              | ***         | 0.0002           |    |           |       |
| WT CTRL vs. WT IFN $\gamma$                                   | 7957       | 1054 to 14860      | Yes              | *           | 0.0174           |    |           |       |
| WT CTRL vs. KO IFN $\gamma$                                   | -10046     | -16950 to -3143    | Yes              | **          | 0.0015           |    |           |       |
| KO CTRL vs. WT IFN $\gamma$                                   | 19743      | 12840 to 26647     | Yes              | ****        | <0.0001          |    |           |       |
| KO CTRL vs. KO IFN $\gamma$                                   | 1740       | -5164 to 8643      | No               | ns          | 0.9107           |    |           |       |
| WT IFN $\gamma$ vs. KO IFN $\gamma$                           | -18003     | -24907 to -11100   | Yes              | ****        | <0.0001          |    |           |       |
|                                                               |            |                    |                  |             |                  |    |           |       |
| Test details                                                  | Mean 1     | Mean 2             | Mean Diff.       | SE of diff. | N1               | N2 | q         | DF    |
|                                                               |            |                    |                  |             |                  |    |           |       |
| <b>7</b>                                                      |            |                    |                  |             |                  |    |           |       |
| WT CTRL vs. KO CTRL                                           | 8.506      | 23.48              | -14.97           | 2625        | 7                | 7  | 0.008066  | 72.00 |
| WT CTRL vs. WT IFN $\gamma$                                   | 8.506      | 1.497              | 7.008            | 2625        | 7                | 7  | 0.003776  | 72.00 |
| WT CTRL vs. KO IFN $\gamma$                                   | 8.506      | 22.22              | -13.72           | 2625        | 7                | 7  | 0.007391  | 72.00 |
| KO CTRL vs. WT IFN $\gamma$                                   | 23.48      | 1.497              | 21.98            | 2625        | 7                | 7  | 0.01184   | 72.00 |
| KO CTRL vs. KO IFN $\gamma$                                   | 23.48      | 22.22              | 1.254            | 2625        | 7                | 7  | 0.0006754 | 72.00 |
| WT IFN $\gamma$ vs. KO IFN $\gamma$                           | 1.497      | 22.22              | -20.73           | 2625        | 7                | 7  | 0.01117   | 72.00 |
|                                                               |            |                    |                  |             |                  |    |           |       |
| <b>10</b>                                                     |            |                    |                  |             |                  |    |           |       |
| WT CTRL vs. KO CTRL                                           | 3727       | 6130               | -2404            | 2625        | 7                | 7  | 1.295     | 72.00 |
| WT CTRL vs. WT IFN $\gamma$                                   | 3727       | 269.5              | 3457             | 2625        | 7                | 7  | 1.863     | 72.00 |
| WT CTRL vs. KO IFN $\gamma$                                   | 3727       | 7746               | -4020            | 2625        | 7                | 7  | 2.166     | 72.00 |
| KO CTRL vs. WT IFN $\gamma$                                   | 6130       | 269.5              | 5861             | 2625        | 7                | 7  | 3.158     | 72.00 |
| KO CTRL vs. KO IFN $\gamma$                                   | 6130       | 7746               | -1616            | 2625        | 7                | 7  | 0.8707    | 72.00 |
| WT IFN $\gamma$ vs. KO IFN $\gamma$                           | 269.5      | 7746               | -7477            | 2625        | 7                | 7  | 4.028     | 72.00 |
|                                                               |            |                    |                  |             |                  |    |           |       |
| <b>12</b>                                                     |            |                    |                  |             |                  |    |           |       |
| WT CTRL vs. KO CTRL                                           | 11689      | 23475              | -11786           | 2625        | 7                | 7  | 6.350     | 72.00 |
| WT CTRL vs. WT IFN $\gamma$                                   | 11689      | 3732               | 7957             | 2625        | 7                | 7  | 4.287     | 72.00 |
| WT CTRL vs. KO IFN $\gamma$                                   | 11689      | 21736              | -10046           | 2625        | 7                | 7  | 5.413     | 72.00 |
| KO CTRL vs. WT IFN $\gamma$                                   | 23475      | 3732               | 19743            | 2625        | 7                | 7  | 10.64     | 72.00 |
| KO CTRL vs. KO IFN $\gamma$                                   | 23475      | 21736              | 1740             | 2625        | 7                | 7  | 0.9373    | 72.00 |
| WT IFN $\gamma$ vs. KO IFN $\gamma$                           | 3732       | 21736              | -18003           | 2625        | 7                | 7  | 9.700     | 72.00 |

Figure 6C

| Within each row, compare columns (simple effects within rows) |                           |                       |                           |             |                  |    |         |       |
|---------------------------------------------------------------|---------------------------|-----------------------|---------------------------|-------------|------------------|----|---------|-------|
| Number of families                                            | 2                         |                       |                           |             |                  |    |         |       |
| Number of comparisons per family                              | 10                        |                       |                           |             |                  |    |         |       |
| Alpha                                                         | 0.05                      |                       |                           |             |                  |    |         |       |
| Šídák's multiple comparisons test                             | Predicted (LS) mean diff. | 95.00% CI of diff.    | Below threshold?          | Summary     | Adjusted P Value |    |         |       |
| <b>13</b>                                                     |                           |                       |                           |             |                  |    |         |       |
| CTRL vs. IFNa                                                 | 3613                      | -17441 to 24668       | No                        | ns          | >0.9999          |    |         |       |
| CTRL vs. IFNa/IFN $\gamma$                                    | 1807                      | -14274 to 17887       | No                        | ns          | >0.9999          |    |         |       |
| CTRL vs. IFNa/TNF $\alpha$                                    | 1556                      | -16336 to 19449       | No                        | ns          | >0.9999          |    |         |       |
| CTRL vs. IFN $\gamma$ /TNF $\alpha$                           | 3850                      | -6870 to 14570        | No                        | ns          | 0.9721           |    |         |       |
| IFNa vs. IFNa/IFN $\gamma$                                    | -1807                     | -25346 to 21732       | No                        | ns          | >0.9999          |    |         |       |
| IFNa vs. IFNa/TNF $\alpha$                                    | -2057                     | -26870 to 22755       | No                        | ns          | >0.9999          |    |         |       |
| IFNa vs. IFN $\gamma$ /TNF $\alpha$                           | 236.6                     | -20023 to 20496       | No                        | ns          | >0.9999          |    |         |       |
| IFNa/IFN $\gamma$ vs. IFNa/TNF $\alpha$                       | -250.2                    | -21010 to 20509       | No                        | ns          | >0.9999          |    |         |       |
| IFNa/IFN $\gamma$ vs. IFN $\gamma$ /TNF $\alpha$              | 2043                      | -12981 to 17068       | No                        | ns          | >0.9999          |    |         |       |
| IFNa/TNF $\alpha$ vs. IFN $\gamma$ /TNF $\alpha$              | 2294                      | -14656 to 19244       | No                        | ns          | >0.9999          |    |         |       |
| <b>15</b>                                                     |                           |                       |                           |             |                  |    |         |       |
| CTRL vs. IFNa                                                 | 36202                     | 14009 to 58394        | Yes                       | ***         | 0.0001           |    |         |       |
| CTRL vs. IFNa/IFN $\gamma$                                    | 27490                     | 9945 to 45034         | Yes                       | ***         | 0.0003           |    |         |       |
| CTRL vs. IFNa/TNF $\alpha$                                    | 21612                     | 2393 to 40831         | Yes                       | *           | 0.0178           |    |         |       |
| CTRL vs. IFN $\gamma$ /TNF $\alpha$                           | 34791                     | 21979 to 47603        | Yes                       | ****        | <0.0001          |    |         |       |
| IFNa vs. IFNa/IFN $\gamma$                                    | -8712                     | -32251 to 14827       | No                        | ns          | 0.9658           |    |         |       |
| IFNa vs. IFNa/TNF $\alpha$                                    | -14590                    | -39402 to 10223       | No                        | ns          | 0.6217           |    |         |       |
| IFNa vs. IFN $\gamma$ /TNF $\alpha$                           | -1411                     | -21670 to 18849       | No                        | ns          | >0.9999          |    |         |       |
| IFNa/IFN $\gamma$ vs. IFNa/TNF $\alpha$                       | -5878                     | -26637 to 14882       | No                        | ns          | 0.9952           |    |         |       |
| IFNa/IFN $\gamma$ vs. IFN $\gamma$ /TNF $\alpha$              | 7301                      | -7723 to 22326        | No                        | ns          | 0.8313           |    |         |       |
| IFNa/TNF $\alpha$ vs. IFN $\gamma$ /TNF $\alpha$              | 13179                     | -3771 to 30129        | No                        | ns          | 0.2432           |    |         |       |
| <b>Test details</b>                                           | Predicted (LS) mean 1     | Predicted (LS) mean 2 | Predicted (LS) mean diff. | SE of diff. | N1               | N2 | t       | DF    |
| <b>13</b>                                                     |                           |                       |                           |             |                  |    |         |       |
| CTRL vs. IFNa                                                 | 4610                      | 996.5                 | 3613                      | 7244        | 10               | 2  | 0.4988  | 60.00 |
| CTRL vs. IFNa/IFN $\gamma$                                    | 4610                      | 2803                  | 1807                      | 5533        | 10               | 4  | 0.3265  | 60.00 |
| CTRL vs. IFNa/TNF $\alpha$                                    | 4610                      | 3054                  | 1556                      | 6156        | 10               | 3  | 0.2528  | 60.00 |
| CTRL vs. IFN $\gamma$ /TNF $\alpha$                           | 4610                      | 759.9                 | 3850                      | 3689        | 10               | 18 | 1.044   | 60.00 |
| IFNa vs. IFNa/IFN $\gamma$                                    | 996.5                     | 2803                  | -1807                     | 8099        | 2                | 4  | 0.2231  | 60.00 |
| IFNa vs. IFNa/TNF $\alpha$                                    | 996.5                     | 3054                  | -2057                     | 8537        | 2                | 3  | 0.2410  | 60.00 |
| IFNa vs. IFN $\gamma$ /TNF $\alpha$                           | 996.5                     | 759.9                 | 236.6                     | 6971        | 2                | 18 | 0.03394 | 60.00 |
| IFNa/IFN $\gamma$ vs. IFNa/TNF $\alpha$                       | 2803                      | 3054                  | -250.2                    | 7143        | 4                | 3  | 0.03503 | 60.00 |
| IFNa/IFN $\gamma$ vs. IFN $\gamma$ /TNF $\alpha$              | 2803                      | 759.9                 | 2043                      | 5170        | 4                | 18 | 0.3953  | 60.00 |
| IFNa/TNF $\alpha$ vs. IFN $\gamma$ /TNF $\alpha$              | 3054                      | 759.9                 | 2294                      | 5832        | 3                | 18 | 0.3933  | 60.00 |
| <b>15</b>                                                     |                           |                       |                           |             |                  |    |         |       |
| CTRL vs. IFNa                                                 | 52701                     | 16500                 | 36202                     | 7636        | 6                | 2  | 4.741   | 60.00 |
| CTRL vs. IFNa/IFN $\gamma$                                    | 52701                     | 25212                 | 27490                     | 6037        | 6                | 4  | 4.554   | 60.00 |
| CTRL vs. IFNa/TNF $\alpha$                                    | 52701                     | 31089                 | 21612                     | 6613        | 6                | 3  | 3.268   | 60.00 |
| CTRL vs. IFN $\gamma$ /TNF $\alpha$                           | 52701                     | 17910                 | 34791                     | 4408        | 6                | 18 | 7.892   | 60.00 |
| IFNa vs. IFNa/IFN $\gamma$                                    | 16500                     | 25212                 | -8712                     | 8099        | 2                | 4  | 1.076   | 60.00 |
| IFNa vs. IFNa/TNF $\alpha$                                    | 16500                     | 31089                 | -14590                    | 8537        | 2                | 3  | 1.709   | 60.00 |
| IFNa vs. IFN $\gamma$ /TNF $\alpha$                           | 16500                     | 17910                 | -1411                     | 6971        | 2                | 18 | 0.2024  | 60.00 |
| IFNa/IFN $\gamma$ vs. IFNa/TNF $\alpha$                       | 25212                     | 31089                 | -5878                     | 7143        | 4                | 3  | 0.8229  | 60.00 |
| IFNa/IFN $\gamma$ vs. IFN $\gamma$ /TNF $\alpha$              | 25212                     | 17910                 | 7301                      | 5170        | 4                | 18 | 1.412   | 60.00 |
| IFNa/TNF $\alpha$ vs. IFN $\gamma$ /TNF $\alpha$              | 31089                     | 17910                 | 13179                     | 5832        | 3                | 18 | 2.260   | 60.00 |



Figure 6E

| Within each row, compare columns (simple effects within rows) |                           |                       |                       |             |                  |    |          |       |
|---------------------------------------------------------------|---------------------------|-----------------------|-----------------------|-------------|------------------|----|----------|-------|
|                                                               | Predicted (LS) mean diff. | 95.00% CI of diff.    | Below threshold?      | Summary     | Adjusted P Value |    |          |       |
| Number of families                                            | 3                         |                       |                       |             |                  |    |          |       |
| Number of comparisons per family                              | 28                        |                       |                       |             |                  |    |          |       |
| Alpha                                                         | 0.05                      |                       |                       |             |                  |    |          |       |
| <b>Tukey's multiple comparisons test</b>                      |                           |                       |                       |             |                  |    |          |       |
| <b>11</b>                                                     |                           |                       |                       |             |                  |    |          |       |
| CTRL isotype vs. CTRL +aCTLA4                                 | 1370                      | -82114 to 84854       | No                    | ns          | >0.9999          |    |          |       |
| CTRL isotype vs. CTRL +aLAG3                                  | 1932                      | -87062 to 90927       | No                    | ns          | >0.9999          |    |          |       |
| CTRL isotype vs. CTRL +1-MT                                   | -1609                     | -90604 to 87385       | No                    | ns          | >0.9999          |    |          |       |
| CTRL isotype vs. IFNy isotype                                 | 1843                      | -72616 to 76301       | No                    | ns          | >0.9999          |    |          |       |
| CTRL isotype vs. IFNy +aCTLA4                                 | 2167                      | -74537 to 78871       | No                    | ns          | >0.9999          |    |          |       |
| CTRL isotype vs. IFNy +aLAG3                                  | 2507                      | -74196 to 79211       | No                    | ns          | >0.9999          |    |          |       |
| CTRL isotype vs. IFNy +1-MT                                   | 2409                      | -77190 to 82009       | No                    | ns          | >0.9999          |    |          |       |
| CTRL +aCTLA4 vs. CTRL +aLAG3                                  | 562.1                     | -91924 to 93048       | No                    | ns          | >0.9999          |    |          |       |
| CTRL +aCTLA4 vs. CTRL +1-MT                                   | -2979                     | -95465 to 89507       | No                    | ns          | >0.9999          |    |          |       |
| CTRL +aCTLA4 vs. IFNy isotype                                 | 472.4                     | -78125 to 79070       | No                    | ns          | >0.9999          |    |          |       |
| CTRL +aCTLA4 vs. IFNy +aCTLA4                                 | 796.9                     | -79931 to 81525       | No                    | ns          | >0.9999          |    |          |       |
| CTRL +aCTLA4 vs. IFNy +aLAG3                                  | 1137                      | -79591 to 81865       | No                    | ns          | >0.9999          |    |          |       |
| CTRL +aCTLA4 vs. IFNy +1-MT                                   | 1039                      | -82445 to 84524       | No                    | ns          | >0.9999          |    |          |       |
| CTRL +aLAG3 vs. CTRL +1-MT                                    | -3541                     | -101030 to 93947      | No                    | ns          | >0.9999          |    |          |       |
| CTRL +aLAG3 vs. IFNy isotype                                  | -89.68                    | -84517 to 84338       | No                    | ns          | >0.9999          |    |          |       |
| CTRL +aLAG3 vs. IFNy +aCTLA4                                  | 234.8                     | -86180 to 86649       | No                    | ns          | >0.9999          |    |          |       |
| CTRL +aLAG3 vs. IFNy +aLAG3                                   | 575.0                     | -85839 to 86989       | No                    | ns          | >0.9999          |    |          |       |
| CTRL +aLAG3 vs. IFNy +1-MT                                    | 477.3                     | -88517 to 89472       | No                    | ns          | >0.9999          |    |          |       |
| CTRL +1-MT vs. IFNy isotype                                   | 3452                      | -80976 to 87879       | No                    | ns          | >0.9999          |    |          |       |
| CTRL +1-MT vs. IFNy +aCTLA4                                   | 3776                      | -82638 to 90191       | No                    | ns          | >0.9999          |    |          |       |
| CTRL +1-MT vs. IFNy +aLAG3                                    | 4116                      | -82298 to 90531       | No                    | ns          | >0.9999          |    |          |       |
| CTRL +1-MT vs. IFNy +1-MT                                     | 4019                      | -84976 to 93013       | No                    | ns          | >0.9999          |    |          |       |
| IFNy isotype vs. IFNy +aCTLA4                                 | 324.5                     | -71030 to 71679       | No                    | ns          | >0.9999          |    |          |       |
| IFNy isotype vs. IFNy +aLAG3                                  | 664.6                     | -70690 to 72019       | No                    | ns          | >0.9999          |    |          |       |
| IFNy isotype vs. IFNy +1-MT                                   | 567.0                     | -73891 to 75025       | No                    | ns          | >0.9999          |    |          |       |
| IFNy +aCTLA4 vs. IFNy +aLAG3                                  | 340.2                     | -73354 to 74035       | No                    | ns          | >0.9999          |    |          |       |
| IFNy +aCTLA4 vs. IFNy +1-MT                                   | 242.5                     | -76461 to 76946       | No                    | ns          | >0.9999          |    |          |       |
| IFNy +aLAG3 vs. IFNy +1-MT                                    | -97.70                    | -76801 to 76606       | No                    | ns          | >0.9999          |    |          |       |
| <b>13</b>                                                     |                           |                       |                       |             |                  |    |          |       |
| CTRL isotype vs. CTRL +aCTLA4                                 | 5646                      | -77838 to 89130       | No                    | ns          | >0.9999          |    |          |       |
| CTRL isotype vs. CTRL +aLAG3                                  | 24145                     | -59340 to 107629      | No                    | ns          | 0.9862           |    |          |       |
| CTRL isotype vs. CTRL +1-MT                                   | -3446                     | -92440 to 85549       | No                    | ns          | >0.9999          |    |          |       |
| CTRL isotype vs. IFNy isotype                                 | 27966                     | -46492 to 102425      | No                    | ns          | 0.9415           |    |          |       |
| CTRL isotype vs. IFNy +aCTLA4                                 | 26828                     | -49875 to 103532      | No                    | ns          | 0.9598           |    |          |       |
| CTRL isotype vs. IFNy +aLAG3                                  | 35471                     | -41233 to 112174      | No                    | ns          | 0.8425           |    |          |       |
| CTRL isotype vs. IFNy +1-MT                                   | 30308                     | -49291 to 109907      | No                    | ns          | 0.9373           |    |          |       |
| CTRL +aCTLA4 vs. CTRL +aLAG3                                  | 18499                     | -68698 to 105695      | No                    | ns          | 0.9979           |    |          |       |
| CTRL +aCTLA4 vs. CTRL +1-MT                                   | -9092                     | -101578 to 83394      | No                    | ns          | >0.9999          |    |          |       |
| CTRL +aCTLA4 vs. IFNy isotype                                 | 22321                     | -56277 to 100918      | No                    | ns          | 0.9876           |    |          |       |
| CTRL +aCTLA4 vs. IFNy +aCTLA4                                 | 21182                     | -59546 to 101911      | No                    | ns          | 0.9922           |    |          |       |
| CTRL +aCTLA4 vs. IFNy +aLAG3                                  | 29825                     | -50903 to 110553      | No                    | ns          | 0.9463           |    |          |       |
| CTRL +aCTLA4 vs. IFNy +1-MT                                   | 24662                     | -58822 to 108146      | No                    | ns          | 0.9844           |    |          |       |
| CTRL +aLAG3 vs. CTRL +1-MT                                    | -27591                    | -120076 to 64895      | No                    | ns          | 0.9834           |    |          |       |
| CTRL +aLAG3 vs. IFNy isotype                                  | 3822                      | -74776 to 82420       | No                    | ns          | >0.9999          |    |          |       |
| CTRL +aLAG3 vs. IFNy +aCTLA4                                  | 2684                      | -78045 to 83412       | No                    | ns          | >0.9999          |    |          |       |
| CTRL +aLAG3 vs. IFNy +aLAG3                                   | 11326                     | -69402 to 92054       | No                    | ns          | 0.9999           |    |          |       |
| CTRL +aLAG3 vs. IFNy +1-MT                                    | 6163                      | -77321 to 89647       | No                    | ns          | >0.9999          |    |          |       |
| CTRL +1-MT vs. IFNy isotype                                   | 31412                     | -53015 to 115840      | No                    | ns          | 0.9443           |    |          |       |
| CTRL +1-MT vs. IFNy +aCTLA4                                   | 30274                     | -56140 to 116689      | No                    | ns          | 0.9594           |    |          |       |
| CTRL +1-MT vs. IFNy +aLAG3                                    | 38917                     | -47498 to 125331      | No                    | ns          | 0.8599           |    |          |       |
| CTRL +1-MT vs. IFNy +1-MT                                     | 33754                     | -55241 to 122748      | No                    | ns          | 0.9385           |    |          |       |
| IFNy isotype vs. IFNy +aCTLA4                                 | -1138                     | -72493 to 70216       | No                    | ns          | >0.9999          |    |          |       |
| IFNy isotype vs. IFNy +aLAG3                                  | 7504                      | -63850 to 78859       | No                    | ns          | >0.9999          |    |          |       |
| IFNy isotype vs. IFNy +1-MT                                   | 2341                      | -72117 to 76799       | No                    | ns          | >0.9999          |    |          |       |
| IFNy +aCTLA4 vs. IFNy +aLAG3                                  | 8643                      | -65052 to 82337       | No                    | ns          | >0.9999          |    |          |       |
| IFNy +aCTLA4 vs. IFNy +1-MT                                   | 3479                      | -73224 to 80183       | No                    | ns          | >0.9999          |    |          |       |
| IFNy +aLAG3 vs. IFNy +1-MT                                    | -5163                     | -81867 to 71541       | No                    | ns          | >0.9999          |    |          |       |
| <b>16</b>                                                     |                           |                       |                       |             |                  |    |          |       |
| CTRL isotype vs. CTRL +aCTLA4                                 | 32436                     | -51048 to 115921      | No                    | ns          | 0.9305           |    |          |       |
| CTRL isotype vs. CTRL +aLAG3                                  | 109947                    | 26483 to 193431       | Yes                   | **          | 0.0022           |    |          |       |
| CTRL isotype vs. CTRL +1-MT                                   | 25355                     | -87215 to 137925      | No                    | ns          | 0.9970           |    |          |       |
| CTRL isotype vs. IFNy isotype                                 | 113970                    | 37266 to 190673       | Yes                   | ***         | 0.0003           |    |          |       |
| CTRL isotype vs. IFNy +aCTLA4                                 | 106219                    | 29516 to 182923       | Yes                   | **          | 0.0010           |    |          |       |
| CTRL isotype vs. IFNy +aLAG3                                  | 183688                    | 106984 to 260391      | Yes                   | ****        | <0.0001          |    |          |       |
| CTRL isotype vs. IFNy +1-MT                                   | 192484                    | 109000 to 275968      | Yes                   | ****        | <0.0001          |    |          |       |
| CTRL +aCTLA4 vs. CTRL +aLAG3                                  | 77511                     | -9686 to 164707       | No                    | ns          | 0.1200           |    |          |       |
| CTRL +aCTLA4 vs. CTRL +1-MT                                   | -7082                     | -122432 to 108268     | No                    | ns          | >0.9999          |    |          |       |
| CTRL +aCTLA4 vs. IFNy isotype                                 | 81533                     | 805.2 to 162262       | Yes                   | *           | 0.0459           |    |          |       |
| CTRL +aCTLA4 vs. IFNy +aCTLA4                                 | 37383                     | -6945 to 154511       | No                    | ns          | 0.0997           |    |          |       |
| CTRL +aCTLA4 vs. IFNy +aLAG3                                  | 151251                    | 70523 to 231979       | Yes                   | ****        | <0.0001          |    |          |       |
| CTRL +aCTLA4 vs. IFNy +1-MT                                   | 160048                    | 72851 to 247244       | Yes                   | ****        | <0.0001          |    |          |       |
| CTRL +aLAG3 vs. CTRL +1-MT                                    | -84592                    | -199942 to 30758      | No                    | ns          | 0.3224           |    |          |       |
| CTRL +aLAG3 vs. IFNy isotype                                  | 4023                      | -76705 to 84751       | No                    | ns          | >0.9999          |    |          |       |
| CTRL +aLAG3 vs. IFNy +aCTLA4                                  | -3728                     | -84456 to 77001       | No                    | ns          | >0.9999          |    |          |       |
| CTRL +aLAG3 vs. IFNy +aLAG3                                   | 73741                     | -6988 to 154469       | No                    | ns          | 0.1001           |    |          |       |
| CTRL +aLAG3 vs. IFNy +1-MT                                    | 82537                     | -4659 to 169733       | No                    | ns          | 0.0775           |    |          |       |
| CTRL +1-MT vs. IFNy isotype                                   | 88615                     | -21927 to 199157      | No                    | ns          | 0.2168           |    |          |       |
| CTRL +1-MT vs. IFNy +aCTLA4                                   | 80865                     | -29677 to 191406      | No                    | ns          | 0.3256           |    |          |       |
| CTRL +1-MT vs. IFNy +aLAG3                                    | 158333                    | 47791 to 268874       | Yes                   | ***         | 0.0006           |    |          |       |
| CTRL +1-MT vs. IFNy +1-MT                                     | 167129                    | 51779 to 282479       | Yes                   | ***         | 0.0005           |    |          |       |
| IFNy isotype vs. IFNy +aCTLA4                                 | -7750                     | -81445 to 65944       | No                    | ns          | >0.9999          |    |          |       |
| IFNy isotype vs. IFNy +aLAG3                                  | 69718                     | -3977 to 143412       | No                    | ns          | 0.0778           |    |          |       |
| IFNy isotype vs. IFNy +1-MT                                   | 78514                     | -2214 to 159242       | No                    | ns          | 0.0628           |    |          |       |
| IFNy +aCTLA4 vs. IFNy +aLAG3                                  | 77468                     | 3774 to 151163        | Yes                   | *           | 0.0320           |    |          |       |
| IFNy +aCTLA4 vs. IFNy +1-MT                                   | 86265                     | 5536 to 166993        | Yes                   | *           | 0.0273           |    |          |       |
| IFNy +aLAG3 vs. IFNy +1-MT                                    | 8796                      | -71932 to 89525       | No                    | ns          | >0.9999          |    |          |       |
| <b>Test details</b>                                           |                           |                       |                       |             |                  |    |          |       |
|                                                               | Predicted (LS) mean 1     | Predicted (LS) mean 2 | Predicted (LS) mean 3 | SE of diff. | N1               | N2 | q        | DF    |
| <b>11</b>                                                     |                           |                       |                       |             |                  |    |          |       |
| CTRL isotype vs. CTRL +aCTLA4                                 | 2612                      | 1242                  | 1370                  | 27039       | 6                | 5  | 0.07166  | 115.0 |
| CTRL isotype vs. CTRL +aLAG3                                  | 2612                      | 679.5                 | 1932                  | 28824       | 6                | 4  | 0.09480  | 115.0 |
| CTRL isotype vs. CTRL +1-MT                                   | 2612                      | 4221                  | -1609                 | 28824       | 6                | 4  | 0.07895  | 115.0 |
| CTRL isotype vs. IFNy isotype                                 | 2612                      | 769.2                 | 1843                  | 24116       | 6                | 8  | 0.1080   | 115.0 |
| CTRL isotype vs. IFNy +aCTLA4                                 | 2612                      | 444.7                 | 2167                  | 24843       | 6                | 7  | 0.1234   | 115.0 |
| CTRL isotype vs. IFNy +aLAG3                                  | 2612                      | 104.5                 | 2507                  | 24843       | 6                | 7  | 0.1427   | 115.0 |
| CTRL isotype vs. IFNy +1-MT                                   | 2612                      | 202.2                 | 2409                  | 25781       | 6                | 6  | 0.1322   | 115.0 |
| CTRL +aCTLA4 vs. CTRL +aLAG3                                  | 1242                      | 679.5                 | 562.1                 | 29955       | 5                | 4  | 0.02654  | 115.0 |
| CTRL +aCTLA4 vs. CTRL +1-MT                                   | 1242                      | 4221                  | -2979                 | 29955       | 5                | 4  | 0.1407   | 115.0 |
| CTRL +aCTLA4 vs. IFNy isotype                                 | 1242                      | 769.2                 | 472.4                 | 25457       | 5                | 8  | 0.02625  | 115.0 |
| CTRL +aCTLA4 vs. IFNy +aCTLA4                                 | 1242                      | 444.7                 | 796.9                 | 26147       | 5                | 7  | 0.04310  | 115.0 |
| CTRL +aCTLA4 vs. IFNy +aLAG3                                  | 1242                      | 104.5                 | 1137                  | 26147       | 5                | 7  | 0.06150  | 115.0 |
| CTRL +aCTLA4 vs. IFNy +1-MT                                   | 1242                      | 202.2                 | 1039                  | 27039       | 5                | 6  | 0.05436  | 115.0 |
| CTRL +aLAG3 vs. CTRL +1-MT                                    | 679.5                     | 4221                  | -3541                 | 31575       | 4                | 4  | 0.1586   | 115.0 |
| CTRL +aLAG3 vs. IFNy isotype                                  | 679.5                     | 769.2                 | -89.68                | 27345       | 4                | 8  | 0.004638 | 115.0 |
| CTRL +aLAG3 vs. IFNy +aCTLA4                                  | 679.5                     | 444.7                 | 234.8                 | 27988       | 4                | 7  | 0.01186  | 115.0 |
| CTRL +aLAG3 vs. IFNy +aLAG3                                   | 679.5                     | 104.5                 | 575.0                 | 27988       | 4                | 7  | 0.02905  | 115.0 |
| CTRL +aLAG3 vs. IFNy +1-MT                                    | 679.5                     | 202.2                 | 477.3                 | 28824       | 4                | 6  | 0.02342  | 115.0 |
| CTRL +1-MT vs. IFNy isotype                                   | 4221                      | 769.2                 | 3452                  | 27345       | 4                | 8  | 0.1785   | 115.0 |
| CTRL +1-MT vs. IFNy +aCTLA4                                   | 4221                      | 444.7                 | 3776                  | 27988       | 4                | 7  | 0.1908   | 115.0 |
| CTRL +1-MT vs. IFNy +aLAG3                                    | 4221                      | 104.5                 | 4116                  | 27988       | 4                | 7  | 0.2080   | 115.0 |
| CTRL +1-MT vs. IFNy +1-MT                                     | 4221                      | 202.2                 | 4019                  | 28824       | 4                | 6  | 0.1972   | 115.0 |
| IFNy isotype vs. IFNy +aCTLA4                                 | 769.2                     | 444.7                 | 324.5                 | 23111       | 8                | 7  | 0.01985  | 115.0 |
| IFNy isotype vs. IFNy +aLAG3                                  | 769.2                     | 104.5                 | 664.6                 | 23111       | 8                | 7  | 0.04067  | 115.0 |
| IFNy isotype vs. IFNy +1-MT                                   | 769.2                     | 202.2                 | 567.0                 | 24116       | 8                | 6  | 0.03325  | 115.0 |
| IFNy +aCTLA4 vs. IFNy +aLAG3                                  | 444.7                     | 104.5                 | 340.2                 | 23869       | 7                | 7  | 0.02016  | 115.0 |
| IFNy +aCTLA4 vs. IFNy +1-MT                                   | 444.7                     | 202.2                 | 242.5                 | 24843       | 7                | 6  | 0.01380  | 115.0 |
| IFNy +aLAG3 vs. IFNy +1-MT                                    | 104.5                     | 202.2                 | -97.70                | 24843       | 7                | 6  | 0.005561 | 115.0 |
| <b>13</b>                                                     |                           |                       |                       |             |                  |    |          |       |
| CTRL isotype vs. CTRL +aCTLA4                                 | 42343                     | 36697                 | 5646                  | 27039       | 6                | 5  | 0.2953   | 115.0 |
| CTRL isotype vs. CTRL +aLAG3                                  | 42343                     | 18198                 | 24145                 | 27039       | 6                | 5  | 1.263    | 115.0 |
| CTRL isotype vs. CTRL +1-MT                                   | 42343                     | 45789                 | -3446                 | 28824       | 6                | 4  | 0.1691   | 115.0 |
| CTRL isotype vs. IFNy isotype                                 | 42343                     | 14376                 | 27966                 | 24116       | 6                | 8  | 1.640    | 115.0 |
| CTRL isotype vs. IFNy +aCTLA4                                 | 42343                     | 15515                 | 26828                 | 24843       | 6                | 7  | 1.527    | 115.0 |
| CTRL isotype vs. IFNy +aLAG3                                  | 42343                     | 6872                  | 35471                 | 24843       | 6                | 7  | 2.019    | 115.0 |
| CTRL isotype vs. IFNy +1-MT                                   | 42343                     | 12035                 | 30308                 | 25781       | 6                | 6  | 1.663    | 115.0 |
| CTRL +aCTLA4 vs. CTRL +aLAG3                                  | 36697                     | 18198                 | 18499                 | 28242       | 5                | 5  | 0.9263   | 115.0 |
| CTRL +aCTLA4 vs. CTRL +1-MT                                   | 36697                     | 45789                 | -9092                 | 29955       | 5                | 4  | 0.4292   | 115.0 |
| CTRL +aCTLA4 vs. IFNy isotype                                 | 36697                     | 14376</               |                       |             |                  |    |          |       |

# Pathology report from engrafted mice

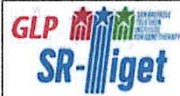

## PATHOLOGY REPORT

Report R&D  
PATH 126

Page 1 of 19

**Collection and histopathology evaluation of tissues from wild-type mice treated with Hematopoietic Stem Cells (HSCs) transduced with a Tie2.lfn2.lfntiviral plasmid**

**Author:**

Francesca Sanvito

GLP SR-TIGET

Responsible Scientist &

Study Pathologist

**Signature:**

Francesca Sanvito

**Date:**

08 June 2021

**MANAGEMENT:**

Paola Albertini

GLP SR-TIGET

Management

**Signature:**

Paola Albertini

**Date:**

08 June 2021



**TABLE OF CONTENTS**

1. DETAILS OF TEST FACILITY AND PERSONNEL..... 3

2. INTRODUCTION ..... 4

3. DEFINITION AND ABBREVIATION..... 4

4. REGULATORY COMPLIANCE..... 4

5. MATERIALS AND METHODS ..... 4

    5.1. Study Design ..... 4

    5.2. Treatment Groups ..... 4

    5.3. Necropsy and histology ..... 5

    5.4. Pathology ..... 5

6. RESULTS ..... 5

    6.1. Mortality/ICDs: Intercurrent deaths ..... 5

    6.2. Terminal Kill ..... 5

        6.2.1. Organ weights and macroscopic findings ..... 5

        6.2.2. Microscopic findings ..... 6

7. CONCLUSION ..... 7

8. REFERENCES..... 7

Appendix ..... 8

**1. DETAILS OF TEST FACILITY AND PERSONNEL**

|                                                    |                                                                                                                                                                                                     |
|----------------------------------------------------|-----------------------------------------------------------------------------------------------------------------------------------------------------------------------------------------------------|
| <b>Test Facility</b>                               | GLP SR-TIGET<br>Ospedale San Raffaele,<br>Via Olgettina, 60<br>20132 Milan, Italy                                                                                                                   |
| <b>Responsible Scientist and Study Pathologist</b> | Francesca Sanvito<br>GLP SR-TIGET                                                                                                                                                                   |
| <b>Reference Scientist</b>                         | Giacomo Desantis<br><br>SR-TIGET                                                                                                                                                                    |
| <b>Scientific Project Responsible</b>              | Bernhard Gentner<br><br>SR-TIGET                                                                                                                                                                    |
| <b>Personnel involved</b>                          | GLP SR-TIGET Test Facility personnel:<br>Michela Vezzoli<br>Maura De Simone<br>Ilaria Visigalli<br>Francesca Cecere<br>Raisa Jofra Hernandez<br>Valentina Mauro<br>Rossana Norata<br>Rocchi Martina |

## 2. INTRODUCTION

The purpose of this study is the necropsy, macroscopic observations, organs collection, and histopathological analysis to evaluate the safety of anti-tumor myeloid-based gene therapy achieved by transplantation of Hematopoietic Stem Cells (HSCs) transduced with a Tie2.Ifn2.Ifntviral plasmid. The plasmid encodes for the murine Ifng gene under regulation of the murine Tie2 gene promoter.

## 3. DEFINITION AND ABBREVIATION

| Table of abbreviations in the Incidence Tables of Microscopic Findings_interim report |                                          |
|---------------------------------------------------------------------------------------|------------------------------------------|
| <b>Depos pigment hepato</b>                                                           | Deposition: tubular epithelium - cortex, |
| <b>Extramed hematopoeie</b>                                                           | Extramedullary hematopoiesis             |
| <b>IHC</b>                                                                            | Immunohistochemistry                     |

## 4. REGULATORY COMPLIANCE

No claim for compliance with GLP is made for this study although the work has been performed following Good Laboratory Practices principles and applicable SOPs.

## 5. MATERIALS AND METHODS

### 5.1. STUDY DESIGN

Female Ly45.2 C57BL/6N mice were transplanted either with  $0.828 \times 10^6$  Ly45.1Lin<sup>-</sup> cells transduced with a Tie2.Ifn $\gamma$  plasmid (Test Item, Group2) or with  $0.843 \times 10^6$  Tie2.Ngfr plasmid (Control Item, Group1) after irradiation regimen (850 cGy) at 8-week age. Animals were monitored for 12 weeks.

### 5.2. TREATMENT GROUPS

| Group Code | Group Name        | Ascentos ID Group | Conditioning | Transplanted Cells                                          | Sex | N° | Mouse ID (RD Path 126) |
|------------|-------------------|-------------------|--------------|-------------------------------------------------------------|-----|----|------------------------|
| 1          | Tie2.Ngfr         | 1                 | 850 cGy      | Tie2.Ngfr-transduced Ly45.1 Lin <sup>-</sup> cells          | F   | 6  | 001-006                |
| 2          | Tie2.Ifn $\gamma$ | 2                 | 850 cGy      | Tie2.Ifn $\gamma$ -transduced Ly45.1 Lin <sup>-</sup> cells | F   | 6  | 007-012                |

F: female

**5.3. NECROPSY AND HISTOLOGY**

A full necropsy was performed and gross observations were recorded from all terminal killed animals at 12 weeks post infusion, for Group 1 and Group 2. Bone marrow (right femur, tibia, and sternum), brain, heart, kidneys, liver (left and right, medial right, medial left,) with gall bladder, lungs, mesenteric lymph nodes, spleen, thymus, and any macroscopic abnormalities were collected as for study plan. Selected organs, heart, lungs, liver, kidneys spleen and thymus were dissected free of fat and weighted. Tissues were processed, embedded in paraffin, sectioned, and stained with haematoxylin and eosin for histological examination. Decalcification was performed for femur, tibia and sternum.

Blocks and slides will be identified as follows: Study N.-group-animal ID.

Immunohistochemical analysis (IHC) using anti CD3, anti CD45R/B220, anti F4/80 and anti IBA1 was performed on thymus of animal R&D PATH126-2-009.

**5.4. PATHOLOGY**

Necropsy, histology and microscopic evaluation of tissues were performed following GLP SR-TIGET SOPs and as for study plan. Terminal body weight, organ weights, macroscopic and microscopic observations were recorded using a dedicated computerized system (Ascentos 1.3.3, PDS Ltd).

Microscopic lesions were graded on a scale of 1 to 5 as minimal, mild, moderate, marked, or severe; minimal referred to the least extent discernible and severe the greatest extent possible. The assessment of the histopathology included an informal blinding step. The slides were reviewed unblinded, to determine the features of the pathology relevant to the disease process and the range of severity of changes relative to the controls. The slides (including controls) were then informally randomised (shuffled), and relevant pathological features scored without information on the treatment groups.

**6. RESULTS**

**6.1. MORTALITY/ICDs: INTERCURRENT DEATHS**

No mortality was recorded.

**6.2. TERMINAL KILL**

**6.2.1. ORGAN WEIGHTS AND MACROSCOPIC FINDINGS**

(Appendix Table 1, Table 2 and Pathology Individual Animal Data)

Terminal body weight, individual organ weights and group mean data are recorded in Table 1 and Table 2. Absolute organ weights and relative organ weights calculated on terminal body weight and on brain weight are represented. No difference in terminal body weights and organ weights were observed in animals between Group 1 and Group 2. The slight difference in lung weights between groups is due to the expected variability of the organ. No macroscopic or microscopic changes were observed.



No macroscopic observations were recorded in animals of both Group 1 and Group 2.

**6.2.2. MICROSCOPIC FINDINGS**

(Appendix: Table 3 and Pathology Individual Animal Data)

**Spleen**

Minimal to mild extramedullary hematopoiesis was detected in all mice across both groups, without difference in severity.

**Thymus**

Mouse R&D PATH 126-2-009 of Group 2 showed T cell lymphoblastic lymphoma. Lymphoma was localized in one lobe and showed diffused CD3 positivity (T cell marker) by immunohistochemistry. Other IHC markers, CD45R/B220 (B cells), anti F4/8 and anti IBA1 were negative in neoplastic cells.

No microscopic changes were seen in the thymus of the other four mice examined in the Group 2 and in the six of the Group 1.

Legend of images: neoplastic lymphocytes have scant cytoplasm and round nuclei. The nuclei have a fine chromatin pattern with either centralized or inconspicuous nucleoli. Mitoses are frequent, and there are scattered tingible-body macrophages.

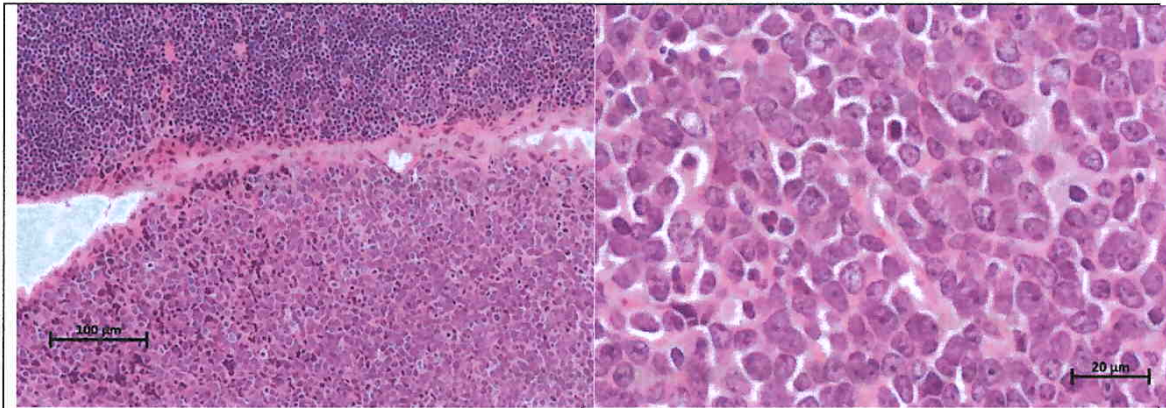

|                                                        |                                                       |
|--------------------------------------------------------|-------------------------------------------------------|
| R&DPATH126-2-009 Thymus Lymphoma. H&E, bar: 100 micron | R&DPATH126-2-009 Thymus Lymphoma. H&E, bar: 20 micron |
|--------------------------------------------------------|-------------------------------------------------------|

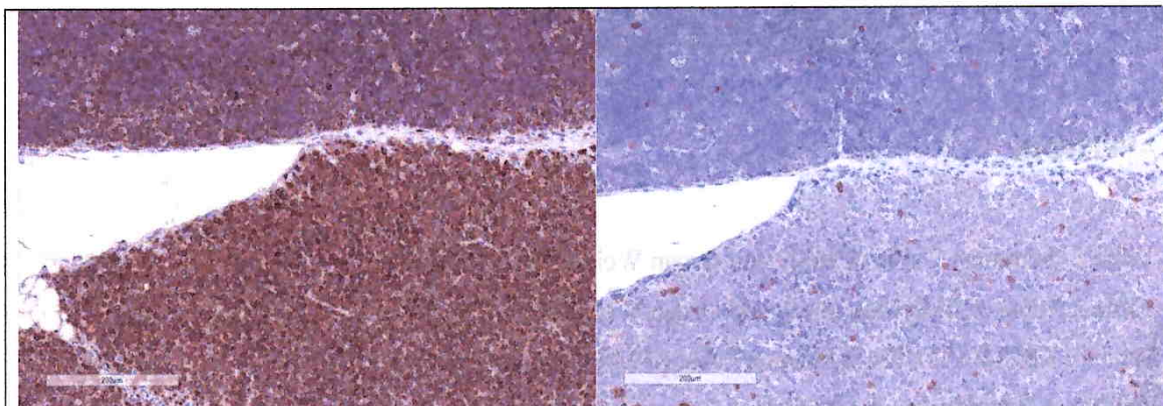

R&DPATH126-2-009 Thymus Lymphoma. CD3, bar: 200 micron

R&DPATH126-2-009 Thymus Lymphoma. CD45R/B220, bar: 200 micron

**Liver**

Mouse R&D PATH 126-2-009 showed a focal minimal deposition of pigment in few hepatocytes.

**Bone marrow, brain, heart, kidneys, gall bladder, lungs, and mesenteric lymph nodes**

No findings were recorded in mice of both groups.

**7. CONCLUSION**

The increased extramedullary hematopoiesis seen in test item treated and control animals represents an expected finding in the spleen of irradiated female mice. One animal transplanted with Hematopoietic Stem Cells (HSCs) transduced with a Tie2.Ifnt2.Ifntiviral plasmid showed localised T cell lymphoblastic lymphoma in thymus. No correlated microscopic findings were seen in other organs nor in the other mice transplanted with the test item. Lymphoma is a spontaneous tumor in mice and the development is enhanced and accelerated by irradiation. Therefore, the occurrence in this study is inconclusive and considered to be incidental (Vesselinovitch, 1971; Ward, 2006; Upton et al., 1960).

**8. REFERENCES**

Vesselinovitch SD, Simmons EL, Mihailovich N, Rao KVN, and Lombard LS. The effect of age, fractionation, and dose on radiation carcinogenesis in various tissues of mice. *Cancer Res* 1971; 31: 2133-42.

Ward JM Lymphomas and leukemias in mice *Exp Toxicol Pathol*. 2006, 57 (5-6): 377-81.

Upton A.C., Kimball A.W. and Furth J. Some Delayed Effects of Atom-Bomb Radiations in Mice. *Cancer Res* 1960; 20: 1-60.

|                     |                         |                                    |
|---------------------|-------------------------|------------------------------------|
| <b>GLP SR-TIGET</b> | <b>PATHOLOGY REPORT</b> | <b>Report R&amp;D<br/>PATH 126</b> |
|                     |                         | Page 8 of 19                       |
|                     |                         | APPENDIX                           |

**APPENDIX**

|                                                                 |         |
|-----------------------------------------------------------------|---------|
| Table 1. Summary Table of Body and Organ Weights and Statistics | pag. 9  |
| Table 2. Table of Individual Body and Organ Weights             | pag. 12 |
| Table 3. R&D PATH 126 Incidence Table of Microscopic Findings   | pag. 14 |
| Pathology Individual Animal Data                                | pag. 16 |



Collection and histopathology evaluation of tissues from wild-type mice treated with Hematopoietic Stem Cells (HSCs) transduced with a Tie2.Ifn2.Ifntviral plasmid.

Table 1

Summary Table of Body and Organ Weights and Statistics  
Status at Necropsy: K0

| Groups                 |                        | Tie2.Ngfr | Tie2.Ifngamma |
|------------------------|------------------------|-----------|---------------|
| Sex                    |                        | F         | F             |
| No. Animals            |                        | 6         | 6             |
| FINAL BODY WEIGHT      | FINAL BODY WEIGHT      |           |               |
|                        | Number of weights      | 6         | 6             |
|                        | Mean weight [g]        | 20.8      | 20.8          |
|                        | Standard Deviation [g] | 1.5       | 1.2           |
| BRAIN                  | BRAIN                  |           |               |
|                        | Number of weights      | 6         | 6             |
|                        | Mean weight [g]        | 0.48      | 0.46          |
|                        | Standard Deviation [g] | 0.08      | 0.06          |
|                        | Mean Organ/Body [%]    | 2.30      | 2.23          |
|                        | Standard Deviation [%] | 0.26      | 0.38          |
| HEART                  | HEART                  |           |               |
|                        | Number of weights      | 6         | 6             |
|                        | Mean weight [g]        | 0.13      | 0.12          |
|                        | Standard Deviation [g] | 0.02      | 0.01          |
|                        | Mean Organ/Body [%]    | 0.61      | 0.60          |
|                        | Standard Deviation [%] | 0.10      | 0.08          |
|                        | Mean Organ/Brain [%]   | 27.04     | 26.82         |
| Standard Deviation [%] | 6.34                   | 1.07      |               |
| LUNG                   | LUNG                   |           |               |
|                        | Number of weights      | 6         | 6             |
|                        | Mean weight [g]        | 0.33      | 0.36          |
|                        | Standard Deviation [g] | 0.02      | 0.11          |
|                        | Mean Organ/Body [%]    | 1.58      | 1.75          |
|                        | Standard Deviation [%] | 0.14      | 0.60          |
|                        | Mean Organ/Brain [%]   | 69.31     | 79.55         |
| Standard Deviation [%] | 8.56                   | 27.92     |               |
| LIVER                  | LIVER                  |           |               |
|                        | Number of weights      | 6         | 6             |
|                        | Mean weight [g]        | 1.19      | 1.19          |
|                        | Standard Deviation [g] | 0.12      | 0.10          |
|                        | Mean Organ/Body [%]    | 5.73      | 5.70          |
|                        | Standard Deviation [%] | 0.29      | 0.23          |
|                        | Mean Organ/Brain [%]   | 250.44    | 260.81        |
| Standard Deviation [%] | 23.41                  | 42.15     |               |

Collection and histopathology evaluation of tissues from wild-type mice treated with Hematopoietic Stem Cells (HSCs) transduced with a Tie2.Ifn2.Iftiviral plasmid.

Table 1

## Summary Table of Body and Organ Weights and Statistics

Status at Necropsy: K0

| Groups      |                        | Tie2.Ngfr | Tie2.Ifngamma |
|-------------|------------------------|-----------|---------------|
| Sex         |                        | F         | F             |
| No. Animals |                        | 6         | 6             |
| KIDNEYS     | KIDNEYS                |           |               |
|             | Number of weights      | 6         | 6             |
|             | Mean weight [g]        | 0.27      | 0.27          |
|             | Standard Deviation [g] | 0.01      | 0.02          |
|             | Mean Organ/Body [%]    | 1.31      | 1.28          |
|             | Standard Deviation [%] | 0.07      | 0.07          |
|             | Mean Organ/Brain [%]   | 57.58     | 58.63         |
|             | Standard Deviation [%] | 8.14      | 8.41          |
| SPLEEN      | SPLEEN                 |           |               |
|             | Number of weights      | 6         | 6             |
|             | Mean weight [g]        | 0.09      | 0.10          |
|             | Standard Deviation [g] | 0.02      | 0.02          |
|             | Mean Organ/Body [%]    | 0.46      | 0.47          |
|             | Standard Deviation [%] | 0.10      | 0.06          |
|             | Mean Organ/Brain [%]   | 20.19     | 21.43         |
|             | Standard Deviation [%] | 5.41      | 4.43          |
| THYMUS      | THYMUS                 |           |               |
|             | Number of weights      | 6         | 6             |
|             | Mean weight [g]        | 0.05      | 0.04          |
|             | Standard Deviation [g] | 0.02      | 0.01          |
|             | Mean Organ/Body [%]    | 0.26      | 0.22          |
|             | Standard Deviation [%] | 0.09      | 0.04          |
|             | Mean Organ/Brain [%]   | 11.75     | 9.93          |
|             | Standard Deviation [%] | 4.90      | 2.60          |

Collection and histopathology evaluation of tissues from wild-type mice treated with Hematopoietic Stem Cells (HSCs) transduced with a Tie2.Ifn2.Ifntiviral plasmid.

---

Table 1

---

Summary Table of Body and Organ Weights and Statistics

Collection and histopathology evaluation of tissues from wild-type mice treated with Hematopoietic Stem Cells (HSCs) transduced with a Tie2.Ifn2.Iftiviral plasmid.

Table 2

## Table of Individual Body and Organ Weights

Dose Group: Tie2.Ngfr, Control

Sex: Female

| Animal Number                  | RDPAT           | RDPAT   | RDPAT   | RDPAT   | RDPAT   | RDPAT   |        |
|--------------------------------|-----------------|---------|---------|---------|---------|---------|--------|
| Days on Test                   | H126-1-         | H126-1- | H126-1- | H126-1- | H126-1- | H126-1- |        |
| Date of Necropsy               | 001             | 002     | 003     | 004     | 005     | 006     |        |
|                                | 83              | 83      | 83      | 84      | 84      | 84      |        |
|                                | 05-             | 05-     | 05-     | 06-     | 06-     | 06-     |        |
| Defined/Actual Necropsy Status | May-21          | May-21  | May-21  | May-21  | May-21  | May-21  |        |
|                                | K0/K0           | K0/K0   | K0/K0   | K0/K0   | K0/K0   | K0/K0   |        |
| <b>FINAL BODY WEIGHT</b>       |                 |         |         |         |         |         |        |
| <b>FINA</b>                    | Total [g]       | 21.0    | 20.1    | 20.3    | 21.9    | 18.6    | 22.9   |
| <b>BRAIN</b>                   | <b>BRAIN</b>    |         |         |         |         |         |        |
|                                | Total [g]       | 0.47    | 0.46    | 0.42    | 0.47    | 0.43    | 0.64   |
|                                | Organ/Body [%]  | 2.23    | 2.29    | 2.06    | 2.13    | 2.31    | 2.81   |
| <b>HEART</b>                   | <b>HEART</b>    |         |         |         |         |         |        |
|                                | Total [g]       | 0.15    | 0.12    | 0.15    | 0.12    | 0.11    | 0.11   |
|                                | Organ/Body [%]  | 0.70    | 0.58    | 0.75    | 0.53    | 0.61    | 0.50   |
|                                | Organ/Brain [%] | 31.23   | 25.50   | 36.49   | 24.89   | 26.41   | 17.73  |
| <b>LUNG</b>                    | <b>LUNG</b>     |         |         |         |         |         |        |
|                                | Total [g]       | 0.33    | 0.34    | 0.29    | 0.34    | 0.33    | 0.34   |
|                                | Organ/Body [%]  | 1.55    | 1.70    | 1.42    | 1.54    | 1.80    | 1.50   |
|                                | Organ/Brain [%] | 69.18   | 74.35   | 68.87   | 72.32   | 77.88   | 53.24  |
| <b>LIVER</b>                   | <b>LIVER</b>    |         |         |         |         |         |        |
|                                | Total [g]       | 1.20    | 1.09    | 1.21    | 1.18    | 1.07    | 1.40   |
|                                | Organ/Body [%]  | 5.69    | 5.43    | 5.95    | 5.38    | 5.77    | 6.14   |
|                                | Organ/Brain [%] | 254.90  | 237.52  | 289.50  | 252.05  | 250.23  | 218.43 |
| <b>KIDNEYS</b>                 | <b>KIDNEYS</b>  |         |         |         |         |         |        |
|                                | Total [g]       | 0.26    | 0.27    | 0.29    | 0.28    | 0.25    | 0.28   |
|                                | Organ/Body [%]  | 1.26    | 1.34    | 1.43    | 1.27    | 1.33    | 1.24   |
|                                | Organ/Brain [%] | 56.26   | 58.57   | 69.39   | 59.44   | 57.82   | 43.97  |
| <b>SPLEEN</b>                  | <b>SPLEEN</b>   |         |         |         |         |         |        |
|                                | Total [g]       | 0.09    | 0.07    | 0.12    | 0.09    | 0.11    | 0.09   |
|                                | Organ/Body [%]  | 0.44    | 0.37    | 0.57    | 0.39    | 0.59    | 0.39   |
|                                | Organ/Brain [%] | 19.84   | 16.10   | 27.54   | 18.21   | 25.69   | 13.78  |
| <b>THYMUS</b>                  | <b>THYMUS</b>   |         |         |         |         |         |        |
|                                | Total [g]       | 0.05    | 0.04    | 0.09    | 0.05    | 0.04    | 0.05   |
|                                | Organ/Body [%]  | 0.24    | 0.21    | 0.44    | 0.23    | 0.22    | 0.24   |
|                                | Organ/Brain [%] | 10.77   | 9.40    | 21.61   | 10.62   | 9.59    | 8.49   |

Collection and histopathology evaluation of tissues from wild-type mice treated with Hematopoietic Stem Cells (HSCs) transduced with a Tie2.Ifn2.Ifntiviral plasmid.

Table 2

Table of Individual Body and Organ Weights

Dose Group: Tie2.Ifn2.Ifn2, Treated

Sex: Female

| Animal Number                  | RD PAT          | RD PAT  | RD PAT  | RD PAT  | RD PAT  | RD PAT  |        |
|--------------------------------|-----------------|---------|---------|---------|---------|---------|--------|
| Days on Test                   | H126-2-         | H126-2- | H126-2- | H126-2- | H126-2- | H126-2- |        |
| Date of Necropsy               | 007             | 008     | 009     | 010     | 011     | 012     |        |
|                                | 83              | 83      | 83      | 84      | 84      | 84      |        |
|                                | 05-             | 05-     | 05-     | 06-     | 06-     | 06-     |        |
|                                | May-21          | May-21  | May-21  | May-21  | May-21  | May-21  |        |
| Defined/Actual Necropsy Status | K0/K0           | K0/K0   | K0/K0   | K0/K0   | K0/K0   | K0/K0   |        |
| FINAL BODY WEIGHT              |                 |         |         |         |         |         |        |
| FINA                           | Total [g]       | 21.3    | 19.3    | 21.9    | 20.9    | 21.9    | 19.5   |
| BRAIN                          | BRAIN           |         |         |         |         |         |        |
|                                | Total [g]       | 0.42    | 0.43    | 0.46    | 0.45    | 0.44    | 0.58   |
|                                | Organ/Body [%]  | 1.97    | 2.21    | 2.10    | 2.14    | 2.01    | 2.98   |
| HEART                          | HEART           |         |         |         |         |         |        |
|                                | Total [g]       | 0.12    | 0.12    | 0.12    | 0.12    | 0.12    | 0.15   |
|                                | Organ/Body [%]  | 0.55    | 0.61    | 0.56    | 0.55    | 0.56    | 0.76   |
|                                | Organ/Brain [%] | 27.92   | 27.60   | 26.56   | 25.80   | 27.69   | 25.38  |
| LUNG                           | LUNG            |         |         |         |         |         |        |
|                                | Total [g]       | 0.30    | 0.55    | 0.27    | 0.30    | 0.41    | 0.34   |
|                                | Organ/Body [%]  | 1.40    | 2.87    | 1.22    | 1.43    | 1.86    | 1.72   |
|                                | Organ/Brain [%] | 71.34   | 130.19  | 58.00   | 67.05   | 92.82   | 57.91  |
| LIVER                          | LIVER           |         |         |         |         |         |        |
|                                | Total [g]       | 1.27    | 1.05    | 1.23    | 1.17    | 1.31    | 1.09   |
|                                | Organ/Body [%]  | 5.96    | 5.44    | 5.60    | 5.59    | 6.01    | 5.59   |
|                                | Organ/Brain [%] | 303.08  | 246.54  | 266.58  | 261.37  | 299.64  | 187.67 |
| KIDNEYS                        | KIDNEYS         |         |         |         |         |         |        |
|                                | Total [g]       | 0.26    | 0.26    | 0.26    | 0.28    | 0.29    | 0.25   |
|                                | Organ/Body [%]  | 1.21    | 1.35    | 1.18    | 1.34    | 1.35    | 1.28   |
|                                | Organ/Brain [%] | 61.63   | 61.06   | 56.18   | 62.67   | 67.21   | 43.06  |
| SPLEEN                         | SPLEEN          |         |         |         |         |         |        |
|                                | Total [g]       | 0.11    | 0.07    | 0.11    | 0.11    | 0.10    | 0.09   |
|                                | Organ/Body [%]  | 0.50    | 0.35    | 0.49    | 0.53    | 0.47    | 0.47   |
|                                | Organ/Brain [%] | 25.27   | 15.65   | 23.45   | 24.73   | 23.58   | 15.92  |
| THYMUS                         | THYMUS          |         |         |         |         |         |        |
|                                | Total [g]       | 0.06    | 0.05    | 0.04    | 0.05    | 0.04    | 0.04   |
|                                | Organ/Body [%]  | 0.28    | 0.23    | 0.17    | 0.25    | 0.17    | 0.21   |
|                                | Organ/Brain [%] | 13.98   | 10.59   | 8.10    | 11.53   | 8.37    | 6.99   |



Collection and histopathology evaluation of tissues from wild-type mice treated with Hematopoietic Stem Cells (HSCs) transduced with a Tie2.Ifn2.Iftviral plasmid.

Table 3. R&DPATH126 Incidence Table of Microscopic Findings

Number of Animals with Microscopic Findings by Organ/Group/Sex, Grade 0..5  
Status at Necropsy: K0 Combined, incl. Decedents

|  |                      | Groups      | Tie2.Ngfr | Tie2.Ifn2gamma |
|--|----------------------|-------------|-----------|----------------|
|  |                      | Sex         | F         | F              |
|  |                      | No. Animals | 6         | 6              |
|  | BRAIN                |             |           |                |
|  |                      | NO. EXAM.   | 6         | 6              |
|  |                      | NAD         | 6         | 6              |
|  | HEART                |             |           |                |
|  |                      | NO. EXAM.   | 6         | 6              |
|  |                      | NAD         | 6         | 6              |
|  | LUNG                 |             |           |                |
|  |                      | NO. EXAM.   | 6         | 6              |
|  |                      | NAD         | 6         | 6              |
|  | LIVER                | LIVER       |           |                |
|  |                      | NO. EXAM.   | 6         | 6              |
|  |                      | NAD         | 6         | 5              |
|  | Depos pigment hepato |             | 0         | 1              |
|  | Grade: 1             |             | 0         | 1              |
|  | GALLBLADDER          |             |           |                |
|  |                      | NO. EXAM.   | 6         | 6              |
|  |                      | NAD         | 6         | 6              |
|  | KIDNEYS              |             |           |                |
|  |                      | NO. EXAM.   | 6         | 6              |
|  |                      | NAD         | 6         | 6              |
|  | SPLEEN               | SPLEEN      |           |                |
|  |                      | NO. EXAM.   | 6         | 6              |
|  |                      | NAD         | 0         | 0              |
|  | Extramed hematopoie  |             | 6         | 6              |
|  | Grade: 1             |             | 4         | 4              |
|  | Grade: 2             |             | 2         | 2              |
|  | BONE MARROW, STERNUM |             |           |                |
|  |                      | NO. EXAM.   | 6         | 6              |
|  |                      | NAD         | 6         | 6              |
|  | BONE MARROW, FEMUR   |             |           |                |
|  |                      | NO. EXAM.   | 6         | 6              |
|  |                      | NAD         | 6         | 6              |
|  | BONE MARROW, TIBIA   |             |           |                |
|  |                      | NO. EXAM.   | 6         | 6              |
|  |                      | NAD         | 6         | 6              |

NO.EXAM. = Number of animals examined

NAD = Nothing Abnormal Discovered

Collection and histopathology evaluation of tissues from wild-type mice treated with Hematopoietic Stem Cells (HSCs) transduced with a Tie2.Ifn2.Ifntiviral plasmid.

Table 3. R&DPATH126 Incidence Table of Microscopic Findings

Number of Animals with Microscopic Findings by Organ/Group/Sex, Grade 0..5  
 Status at Necropsy: K0 Combined, incl. Decedents

|                    |                    | Groups      | Tie2.Ngfr | Tie2.Ifngamma |
|--------------------|--------------------|-------------|-----------|---------------|
|                    |                    | Sex         | F         | F             |
|                    |                    | No. Animals | 6         | 6             |
| THYMUS             | THYMUS             |             |           |               |
|                    |                    | NO. EXAM.   | 6         | 6             |
|                    |                    | NAD         | 6         | 5             |
|                    | Lymphoma           |             | 0         | 1             |
| MESENT. LYMPH NODE |                    |             |           |               |
|                    |                    | NO. EXAM.   | 6         | 6             |
|                    |                    | NAD         | 6         | 6             |
| SYSTEMIC NEOPLASMS | SYSTEMIC NEOPLASMS |             |           |               |
|                    |                    | NO. EXAM.   | 0         | 1             |
|                    |                    | NAD         | -         | 0             |
|                    | Lymphoma malignant |             | -         | 1             |

NO.EXAM. = Number of animals examined  
 NAD = Nothing Abnormal Discovered

Collection and histopathology evaluation of tissues from wild-type mice treated with Hematopoietic Stem Cells (HSCs) transduced with a Tie2.Ifn2.Iftiviral plasmid.

---

R&D PATH 126. Pathology Individual Animal Data

---

ANIMAL NUMBER : RDPATH126 SEX: Female DOSE GROUP: 1  
 -1-001  
 Defined Sacrifice Group : K0  
 State at Necropsy : Terminal sacrifice  
 Date of Necropsy : 05-May-2021  
 Days on Test : 83 (12-Feb-2021 - 05-May-2021)

---

\* MACROSCOPIC OBSERVATIONS

No macroscopic observations noted

\* MICROSCOPIC FINDINGS

SPLEEN

-Extramedullary hematopoiesis, minimal

All other protocol tissues without pathologic findings

---

ANIMAL NUMBER : RDPATH126 SEX: Female DOSE GROUP: 1  
 -1-002  
 Defined Sacrifice Group : K0  
 State at Necropsy : Terminal sacrifice  
 Date of Necropsy : 05-May-2021  
 Days on Test : 83 (12-Feb-2021 - 05-May-2021)

---

\* MACROSCOPIC OBSERVATIONS

No macroscopic observations noted

\* MICROSCOPIC FINDINGS

SPLEEN

-Extramedullary hematopoiesis, minimal

All other protocol tissues without pathologic findings

---

ANIMAL NUMBER : RDPATH126 SEX: Female DOSE GROUP: 1  
 -1-003  
 Defined Sacrifice Group : K0  
 State at Necropsy : Terminal sacrifice  
 Date of Necropsy : 05-May-2021  
 Days on Test : 83 (12-Feb-2021 - 05-May-2021)

---

\* MACROSCOPIC OBSERVATIONS

No macroscopic observations noted

\* MICROSCOPIC FINDINGS

SPLEEN

-Extramedullary hematopoiesis, mild

All other protocol tissues without pathologic findings

---

ANIMAL NUMBER : RDPATH126 SEX: Female DOSE GROUP: 1  
 -1-004  
 Defined Sacrifice Group : K0  
 State at Necropsy : Terminal sacrifice  
 Date of Necropsy : 06-May-2021  
 Days on Test : 84 (12-Feb-2021 - 06-May-2021)

---

Collection and histopathology evaluation of tissues from wild-type mice treated with Hematopoietic Stem Cells (HSCs) transduced with a Tie2.Ifn2.Iftiviral plasmid.

---

R&D PATH 126. Pathology Individual Animal Data

---

Continued Animal: RDPATH126-1-004

\* MACROSCOPIC OBSERVATIONS

No macroscopic observations noted

\* MICROSCOPIC FINDINGS

SPLEEN

-Extramedullary hematopoiesis, minimal

All other protocol tissues without pathologic findings

---

ANIMAL NUMBER : RDPATH126 SEX: Female DOSE GROUP: 1  
-1-005

Defined Sacrifice Group : K0

State at Necropsy : Terminal sacrifice

Date of Necropsy : 06-May-2021

Days on Test : 84 (12-Feb-2021 - 06-May-2021)

---

\* MACROSCOPIC OBSERVATIONS

No macroscopic observations noted

\* MICROSCOPIC FINDINGS

SPLEEN

-Extramedullary hematopoiesis, mild

All other protocol tissues without pathologic findings

---

ANIMAL NUMBER : RDPATH126 SEX: Female DOSE GROUP: 1  
-1-006

Defined Sacrifice Group : K0

State at Necropsy : Terminal sacrifice

Date of Necropsy : 06-May-2021

Days on Test : 84 (12-Feb-2021 - 06-May-2021)

---

\* MACROSCOPIC OBSERVATIONS

No macroscopic observations noted

\* MICROSCOPIC FINDINGS

SPLEEN

-Extramedullary hematopoiesis, minimal

All other protocol tissues without pathologic findings

---

ANIMAL NUMBER : RDPATH126 SEX: Female DOSE GROUP: 2  
-2-007

Defined Sacrifice Group : K0

State at Necropsy : Terminal sacrifice

Date of Necropsy : 05-May-2021

Days on Test : 83 (12-Feb-2021 - 05-May-2021)

---

\* MACROSCOPIC OBSERVATIONS

No macroscopic observations noted

Collection and histopathology evaluation of tissues from wild-type mice treated with Hematopoietic Stem Cells (HSCs) transduced with a Tie2.Ifn2.Iftiviral plasmid.

---

## R&amp;D PATH 126. Pathology Individual Animal Data

Continued Animal: RDPATH126-2-007

## \* MICROSCOPIC FINDINGS

## SPLEEN

-Extramedullary hematopoiesis, minimal

All other protocol tissues without pathologic findings

---

|                         |                                   |               |
|-------------------------|-----------------------------------|---------------|
| ANIMAL NUMBER           | : RDPATH126 SEX: Female<br>-2-008 | DOSE GROUP: 2 |
| Defined Sacrifice Group | : K0                              |               |
| State at Necropsy       | : Terminal sacrifice              |               |
| Date of Necropsy        | : 05-May-2021                     |               |
| Days on Test            | : 83 (12-Feb-2021 - 05-May-2021)  |               |

---

## \* MACROSCOPIC OBSERVATIONS

No macroscopic observations noted

## \* MICROSCOPIC FINDINGS

## SPLEEN

-Extramedullary hematopoiesis, minimal

All other protocol tissues without pathologic findings

---

|                         |                                   |               |
|-------------------------|-----------------------------------|---------------|
| ANIMAL NUMBER           | : RDPATH126 SEX: Female<br>-2-009 | DOSE GROUP: 2 |
| Defined Sacrifice Group | : K0                              |               |
| State at Necropsy       | : Terminal sacrifice              |               |
| Date of Necropsy        | : 05-May-2021                     |               |
| Days on Test            | : 83 (12-Feb-2021 - 05-May-2021)  |               |

---

## \* MACROSCOPIC OBSERVATIONS

No macroscopic observations noted

## \* MICROSCOPIC FINDINGS

## LIVER

-Deposition pigment: hepatocyte, focal, minimal

## SPLEEN

-Extramedullary hematopoiesis, mild

## THYMUS

-Lymphoma (non fatal)

Comment: one lobe

## SYSTEMIC NEOPLASMS

-Lymphoma malignant, lymphoblastic (malignant tumor)

All other protocol tissues without pathologic findings

---

|                         |                                   |               |
|-------------------------|-----------------------------------|---------------|
| ANIMAL NUMBER           | : RDPATH126 SEX: Female<br>-2-010 | DOSE GROUP: 2 |
| Defined Sacrifice Group | : K0                              |               |
| State at Necropsy       | : Terminal sacrifice              |               |
| Date of Necropsy        | : 06-May-2021                     |               |
| Days on Test            | : 84 (12-Feb-2021 - 06-May-2021)  |               |

---



Collection and histopathology evaluation of tissues from wild-type mice treated with Hematopoietic Stem Cells (HSCs) transduced with a Tie2.Ifh2.Ifntviral plasmid.

---

R&D PATH 126. Pathology Individual Animal Data

---

Continued Animal: RDPATH126-2-010

\* MACROSCOPIC OBSERVATIONS (Evaluation Incomplete)

No macroscopic observations noted

\* MICROSCOPIC FINDINGS

SPLEEN

-Extramedullary hematopoiesis, mild

All other protocol tissues without pathologic findings

---

|                         |                                   |               |
|-------------------------|-----------------------------------|---------------|
| ANIMAL NUMBER           | : RDPATH126 SEX: Female<br>-2-011 | DOSE GROUP: 2 |
| Defined Sacrifice Group | : K0                              |               |
| State at Necropsy       | : Terminal sacrifice              |               |
| Date of Necropsy        | : 06-May-2021                     |               |
| Days on Test            | : 84 (12-Feb-2021 - 06-May-2021)  |               |

---

\* MACROSCOPIC OBSERVATIONS

No macroscopic observations noted

\* MICROSCOPIC FINDINGS

SPLEEN

-Extramedullary hematopoiesis, minimal

All other protocol tissues without pathologic findings

---

|                         |                                   |               |
|-------------------------|-----------------------------------|---------------|
| ANIMAL NUMBER           | : RDPATH126 SEX: Female<br>-2-012 | DOSE GROUP: 2 |
| Defined Sacrifice Group | : K0                              |               |
| State at Necropsy       | : Terminal sacrifice              |               |
| Date of Necropsy        | : 06-May-2021                     |               |
| Days on Test            | : 84 (12-Feb-2021 - 06-May-2021)  |               |

---

\* MACROSCOPIC OBSERVATIONS

No macroscopic observations noted

\* MICROSCOPIC FINDINGS

SPLEEN

-Extramedullary hematopoiesis, minimal

All other protocol tissues without pathologic findings

---
