# Supplementary material for: Myeloid cell‐based delivery of IFN‐γ reprograms the leukemia microenvironment and induces anti‐tumoral immune responses
Source: PubMed Central journal article supplement (PMC8495462; doi:10.15252/emmm.202013598), 2021-08-30
Supplement: EMMM-13-e13598-s005.pdf [file EMMM-13-e13598-s005.pdf]

## Expanded View Figures

### Figure EV1. IFN- $\gamma$ and TNF- $\alpha$ gene therapy: engraftment and safety.

- A Third-generation SIN lentiviral vector expression cassette driven by a Tie2 enhancer/promoter (Tie2E, Tie2) and post-transcriptionally regulated by two couples of target sites for microRNA-126 and -130a (miR-126T, miR-130aT).
- B Experimental design of genetically-modified HSPC transplants followed by challenge with B-ALL.
- C Engraftment of CD45.1 donor cells and lineage composition in the blood, as assessed by flow cytometry (mean  $\pm$  SD, each dot represents an individual mouse, two experiments, CTRL = 12 mice, IFN- $\gamma$  = 14 mice, TNF- $\alpha$  = 7 mice).
- D Vector copy number (VCN) in peripheral blood at 8 weeks post-transplantation (mean  $\pm$  SD, each dot represents a pool of 2–3 mice, two experiments).
- E From left to right: white blood cell count (WBC), red blood cell count (RBC), hemoglobin concentration (HGB), and platelet count (PLT) measured by hemocytometer (mean  $\pm$  SD, each dot represents an individual mouse, two experiments, CTRL = 12 mice, IFN- $\gamma$  = 14 mice, TNF- $\alpha$  = 7 mice).
- F–I Mice were transplanted with Tie2.NGFR- (CTRL) ( $n$  = 6) or Tie2.IFN- $\gamma$ - (IFN- $\gamma$ ) ( $n$  = 6) transduced Lin<sup>-</sup> cells and evaluated for potential IFN- $\gamma$ -related toxicity.
- (F) Serum biochemistry at 8 and 12 weeks after transplantation (mean  $\pm$  SD, each dot represents an individual mouse). (G) Gene expression levels of *Ifn $\gamma$*  and IFN- $\gamma$ -related genes in several organs at steady state at 12 weeks after transplantation (mean  $\pm$  SD; \* $P$  = 0.0182 for BM, \* $P$  = 0.0129 for lung, \*\* $P$  = 0.0044, \*\*\*\* $P$   $\leq$  0.0001, ordinary two-way ANOVA) The gray bar shows a single mouse that was systemically (i.p., intraperitoneally) injected with recombinant murine IFN- $\gamma$ .
- (H) IFN- $\gamma$  protein quantification (ELISA) in the plasma of transplanted mice (each dot represents an individual mouse). (I) Bar graphs showing the frequency of HSPC subpopulations in the BM. LSK (CD45<sup>+</sup> Lin<sup>-</sup> Sca1<sup>+</sup> CD117<sup>+</sup> CD34<sup>-</sup> CD150<sup>-</sup>), MPP (CD45<sup>+</sup> lin<sup>-</sup> Sca1<sup>+</sup> CD117<sup>+</sup> CD34<sup>+</sup>), MEP/CMP (CD45<sup>+</sup> lin<sup>-</sup> Sca1<sup>-</sup> CD117<sup>-</sup>); mean  $\pm$  SD, each dot represents an individual mouse.

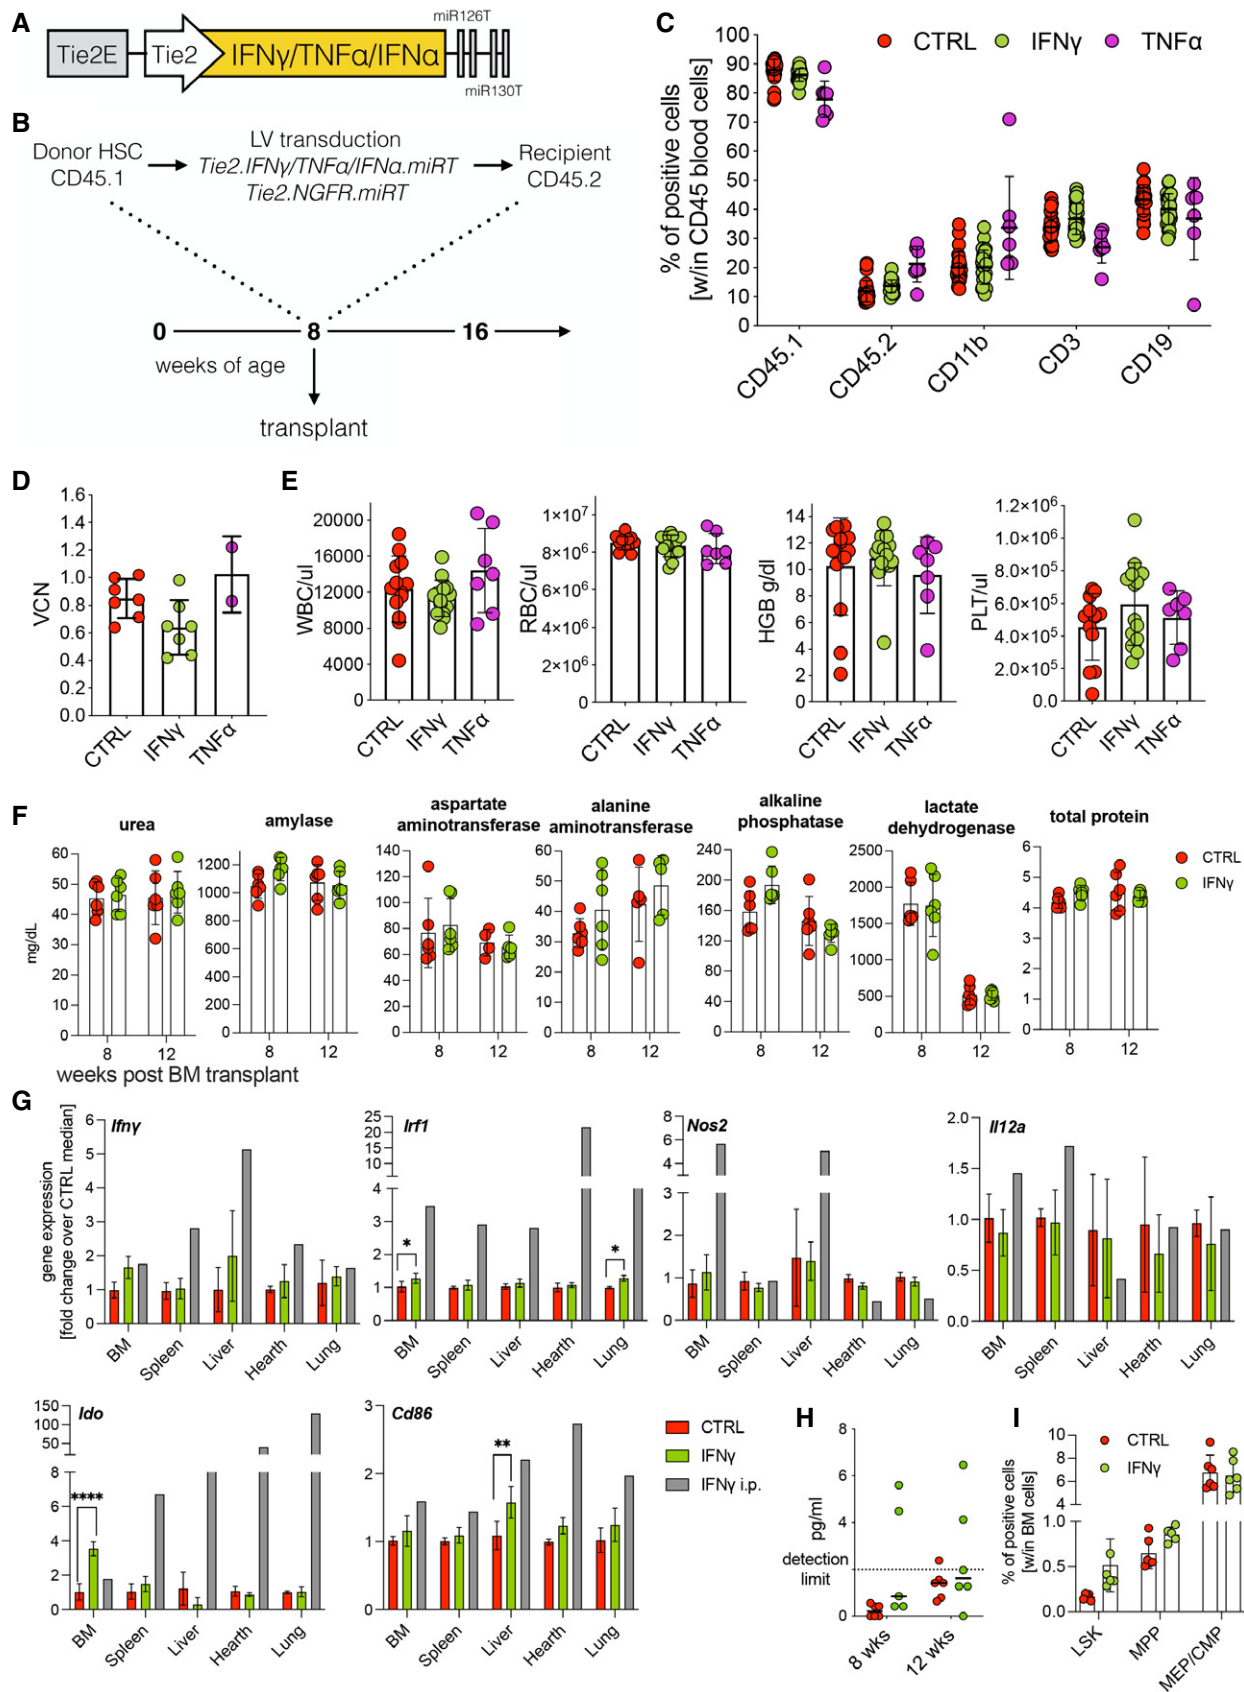

Figure EV1.

**Figure EV2. IFN- $\gamma$ , but not TNF- $\alpha$  shows antitumor efficacy in miR-126-driven B-ALL models.**

- A–C Mice were transplanted with Tie2.NGFR- (CTRL,  $n = 8$  mice), Tie2.IFN- $\gamma$ - (IFN- $\gamma$ ,  $n = 9$  mice) or Tie2.TNF- $\alpha$ - (TNF- $\alpha$ ,  $n = 7$  mice) transduced Lin<sup>-</sup> cells and challenged with B-ALL (line#11). (A) B-ALL progression (line#11) measured as absolute number of OFP<sup>+</sup> cells in the peripheral blood of transplanted mice (mean  $\pm$  SD, each dot represents an individual mouse; \*\* $P = 0.0027$  CTRL vs. IFN- $\gamma$  and \*\* $P = 0.0063$  CTRL vs. TNF- $\alpha$ , \*\*\* $P = 0.0003$ , two-way ANOVA). (B) Percentage of CD8<sup>+</sup> T lymphocytes within OFP<sup>-</sup> CD45<sup>+</sup> splenic cells (mean  $\pm$  SD, each dot represents an individual mouse). (C) Percentage of MHC class II-positive macrophages (M $\phi$ ), identified by F4/80 expression, in the spleen (mean  $\pm$  SD, each dot represents an individual mouse; \*\* $P = 0.0063$ , ordinary one-way ANOVA).
- D–J Mice were transplanted with Tie2.NGFR- (CTRL,  $n = 7$  mice) or Tie2.IFN- $\gamma$ - (IFN- $\gamma$ ,  $n = 16$  mice) transduced Lin<sup>-</sup> cells, and challenged with an independently generated B-ALL clone (line#8). (D) B-ALL progression (line#8) in peripheral blood measured as the percentage of CD45.2<sup>low</sup> OFP<sup>+</sup> cells within CD45<sup>+</sup> cells (mean  $\pm$  SD, each dot represents an individual mouse; \*\*\*\* $P \leq 0.0001$ , ordinary two-way ANOVA with Geisser–Greenhouse correction). (E) B-ALL burden in the BM measured as the percentage of CD45.2<sup>low</sup> OFP<sup>+</sup> cells within CD45<sup>+</sup> cells (mean  $\pm$  SD, each dot represents an individual mouse). (F) Bar graphs showing MFI of MHC II on OFP<sup>+</sup> B-ALL cells in the BM (mean  $\pm$  SD, each dot represents an individual mouse,  $P = 0.06$ , Mann–Whitney test). (G) Bar graphs showing the mean fluorescence intensity of MHC II on BM macrophages (identified as CD45.1<sup>+</sup> OFP<sup>-</sup> CD11b<sup>+</sup> F4/80<sup>+</sup> cells) (mean  $\pm$  SD, each dot represents an individual mouse; \*\* $P \leq 0.01$ , Mann–Whitney test). (H) Bar graphs showing the percentage of macrophages within OFP<sup>-</sup> cells in the BM (mean  $\pm$  SD, each dot represents an individual mouse; no significant differences were revealed by Mann–Whitney test). (I) Bar graphs showing the percentage of CD4<sup>+</sup> or CD8<sup>+</sup> T lymphocytes within OFP<sup>-</sup> CD3<sup>+</sup> cells in the BM (mean  $\pm$  SD, each dot represents an individual mouse; no significant differences were revealed by Mann–Whitney test). (J) Distribution of lymphocyte maturation stages within OFP<sup>-</sup> CD8<sup>+</sup> T cells in the BM (mean  $\pm$  SD, each dot represents an individual mouse; no significant differences were revealed by Mann–Whitney test).

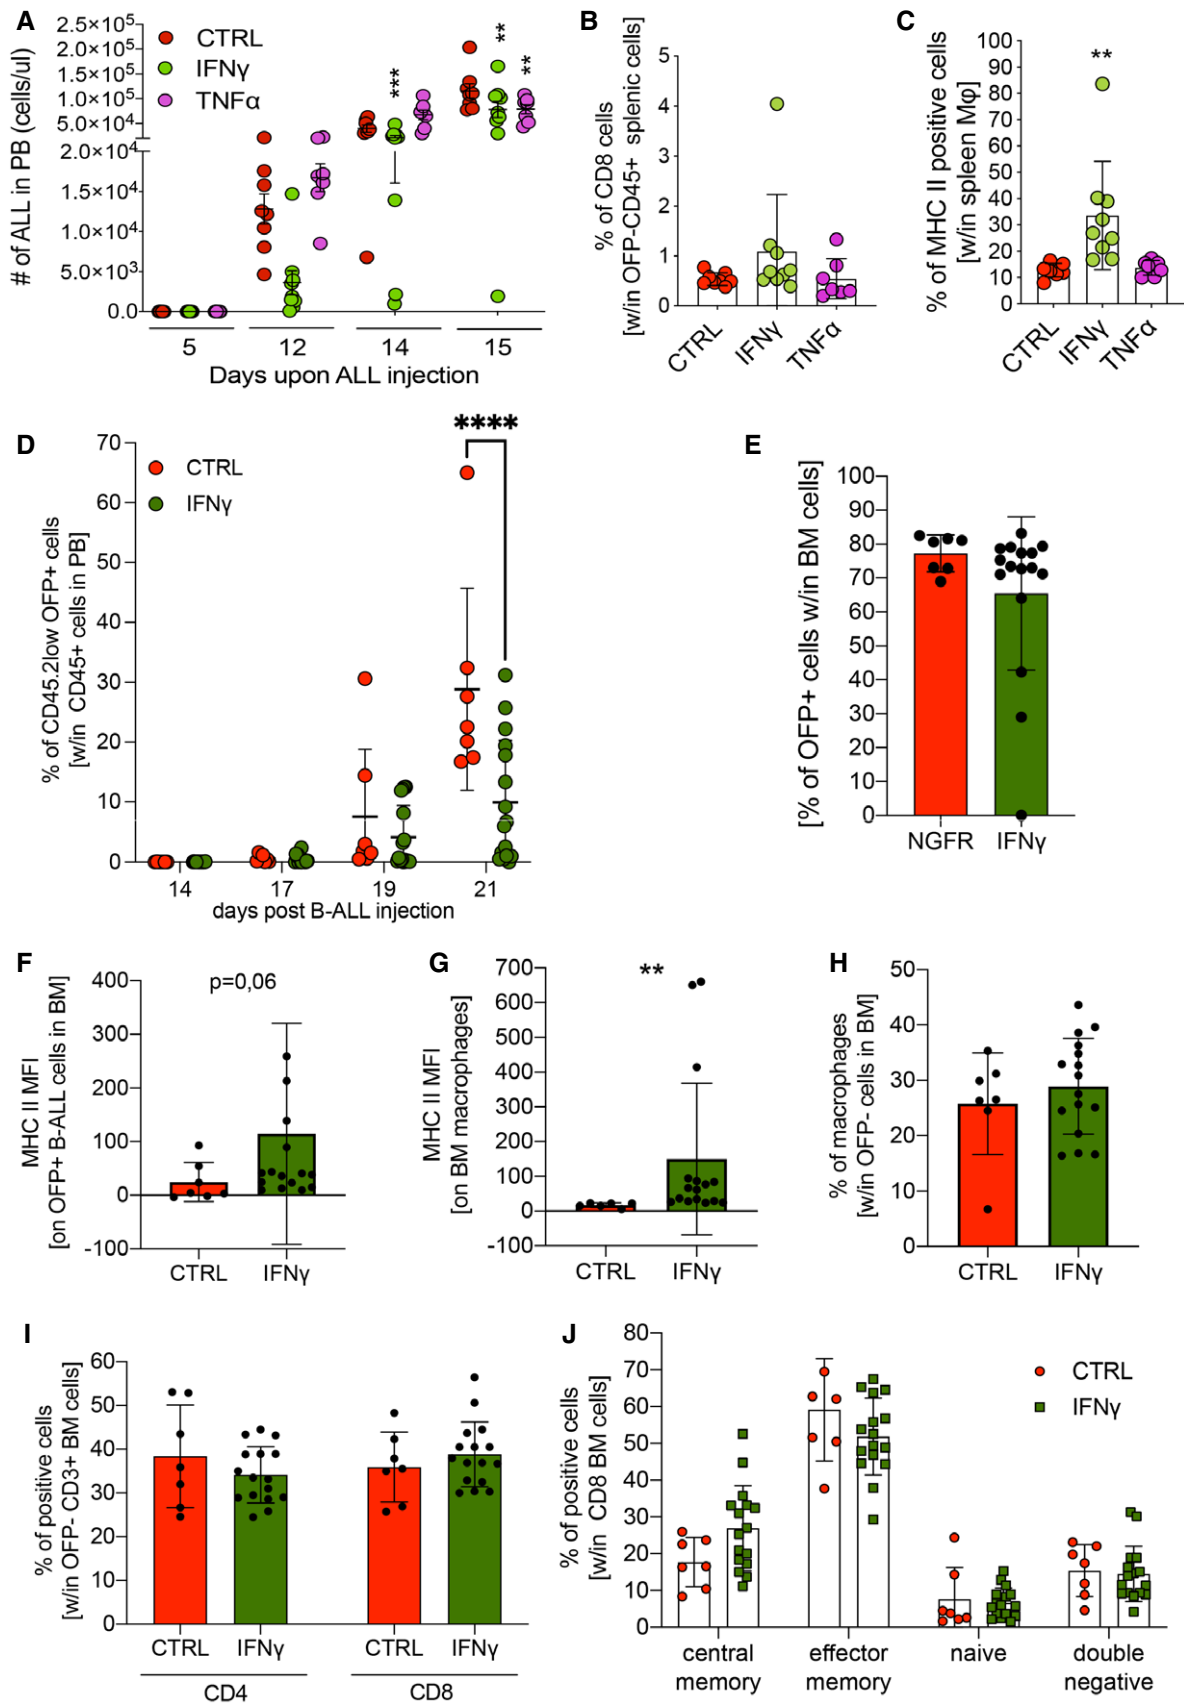

Figure EV2.

**Figure EV3. IFN- $\gamma$  gene therapy exerts anti-leukemia effects in a relapse B-ALL model and can be implemented in a humanized setting.**

- A** Experimental design. First part (therapeutic model): female CD45.2 C57 mice were injected with B-ALL (line#11). After 3 days, mice were treated with a single dose of 0.5 mg/kg vincristine. On day 4, mice were lethally irradiated, followed by transplantation of Tie2-IFN- $\gamma$ -transduced or untransduced CD45.1 lin<sup>-</sup> cells the day after. Leukemic burden was monitored by serial blood draws. Second part (relapse model): mice that were tumor-free 8 weeks (day-7) after initial B-ALL injection (confirmed by sentinel BM aspirate) were rechallenged with  $1 \times 10^5$  B-ALL cells from an NGFR<sup>+</sup>/OVA<sup>+</sup> subclone of disease#11 (OVA B-ALL) and followed for leukemia growth over time. The experimental endpoint was defined as the first demonstration of leukemia burden above 70% in the blood, or clinical signs of suffering.
- B** Leukemia burden in the therapeutic B-ALL model (merge of two replicate experiments: Exp#1, IFN- $\gamma$  = 6 mice, CTRL = 5 mice; Exp#2, IFN- $\gamma$  = 10 mice, CTRL = 10 mice). Absolute counts of CD45.2<sup>low</sup>CD19<sup>+</sup> blasts in the blood are shown. Note that, at the 12 and 15 week time-points, there was a trend toward lower disease burden in the IFN- $\gamma$  group (mean  $\pm$  SD, each dot represents an individual mouse).
- C–E** Leukemia-free mice from Exp#2 were injected with OVA B-ALL (IFN- $\gamma$  = 10 mice, UT = 10 mice). **(C)** Weight loss over time after OVA B-ALL injection (mean  $\pm$  SD, each dot represents an individual mouse; \*\*\* $P \leq 0.001$ , \*\*\*\* $P \leq 0.0001$ , two-way ANOVA). **(D)** Leukemia burden in the relapse B-ALL model (mean  $\pm$  SD, each dot represents an individual mouse; \*\*\* $P \leq 0.001$ , \*\*\*\* $P \leq 0.0001$ , two-way ANOVA). **(E)** Survival curve after OVA B-ALL injection (one experiment, UT = 9 mice, IFN- $\gamma$  = 9 mice, one experiment, \* $P \leq 0.05$ , log-rank [Mantel–Cox] test).
- F** Human peripheral blood mononuclear cells were obtained from buffy coats ( $n = 3$  donors), transduced or not with the human TIE2-IFN- $\gamma$  or a PGK-NGFR control construct in the presence of VPX, and polarized to an M2-like phenotype in culture. As a positive control, soluble IFN- $\gamma$  protein (sIFN- $\gamma$ ) was used. The levels of human IFN- $\gamma$  were quantified by ELISA (mean  $\pm$  SD).
- G** Human CD34<sup>+</sup> cells (single donor) were transduced or not with the human TIE2-IFN- $\gamma$  construct (vector copy number: 0.81) and cultured for 2 weeks in myeloid differentiating conditions at appropriate cell densities. The growth curve indicates no negative impact from transduction with the TIE2-IFN- $\gamma$  construct.
- H** Human CD34<sup>+</sup> cells (single donor) were transduced or not with the human TIE2-IFN- $\gamma$  construct (vector copy number: 0.81, as per point G) and cultured for 2 weeks in methylcellulose. Clonogenic potential (number of CFU-G/M or BFU-E per 3-cm plate) is shown, indicating no negative impact from transduction with the TIE2-IFN- $\gamma$  construct (three technical replicates, mean  $\pm$  SEM).
- I** Schematic representation of a therapeutic, humanized B-ALL model. NSGW41 mice were injected with a luciferase-marked, primary human B-ALL (week 6). After detection of B-ALL by bioluminescence imaging (week 10), two cycles of vincristine/dexamethasone chemotherapy were administered as induction treatment. Mice were then transplanted with two doses of  $1 \times 10^6$  CD34<sup>+</sup> HSPC, transduced or not with the human TIE2-IFN- $\gamma$  lentiviral vector (weeks 12 and 15). Disease progression was measured on week 17 (2 and 5 weeks after CD34<sup>+</sup> cell transplants, respectively). Not surprisingly, there were no differences between experimental groups, as relevant CD34<sup>+</sup> HSPC engraftment levels may not be reached until 6 weeks after transplant. To contain B-ALL growth, a single dose of  $1 \times 10^6$  CD19 CAR-T cells (autologous to the CD34<sup>+</sup> graft) was administered (week 18- day 0), and mice were followed by periodic bleeding and bioluminescence imaging until they developed CAR-T-related complications (after day+14).
- J** Human myeloid cell engraftment in the blood before (day-7) and after CD19 CAR-T cell injection (day+14), estimated as the fraction of human CD45<sup>+</sup>/NGFR<sup>-</sup>/CD19<sup>-</sup> cells in the blood. Note that both the CD19 CAR-T cells and the B-ALL are marked by NGFR. There were no differences between human myeloid engraftment of mock-transduced, TIE2-IFN- $\gamma$ -transduced or non-CAR-T-treated mice. Engraftment increased to therapeutically relevant levels at day+14 (mean  $\pm$  SD, each dot represents an individual mouse; h-IFN- $\gamma$ /CAR-T = 5 mice, UT/CAR-T = 5 mice, w/o CAR-T = 6 mice, three of which from the UT and three from the h-IFN- $\gamma$  group).
- K** Monitoring of B-ALL burden by bioluminescence imaging (mean  $\pm$  SEM; h-IFN- $\gamma$ /CAR-T = 5 mice, UT/CAR-T = 5 mice, w/o CAR-T = 6 mice, three of which from the UT and three from the h-IFN- $\gamma$  group). Please note a trend toward lower disease burden on day+14 in the CD19 CAR-T cell-treated mice from the TIE2-IFN- $\gamma$  group, providing an initial proof of concept that this treatment may be active in a clinically relevant, human leukemia model. Future studies will employ T cell preparations that do not cause xenogeneic graft-versus-host disease, thereby allowing longer follow-up.
- L** Representative FACS plots (gated on hCD45<sup>+</sup>NGFR<sup>-</sup> cells) of mice transplanted with TIE2-IFN- $\gamma$ -transduced CD34<sup>+</sup> cells and treated or not with CD19 CAR-T cells on day+14. Note that CD19 CAR-T cell treatment induced human B-cell aplasia, as expected.

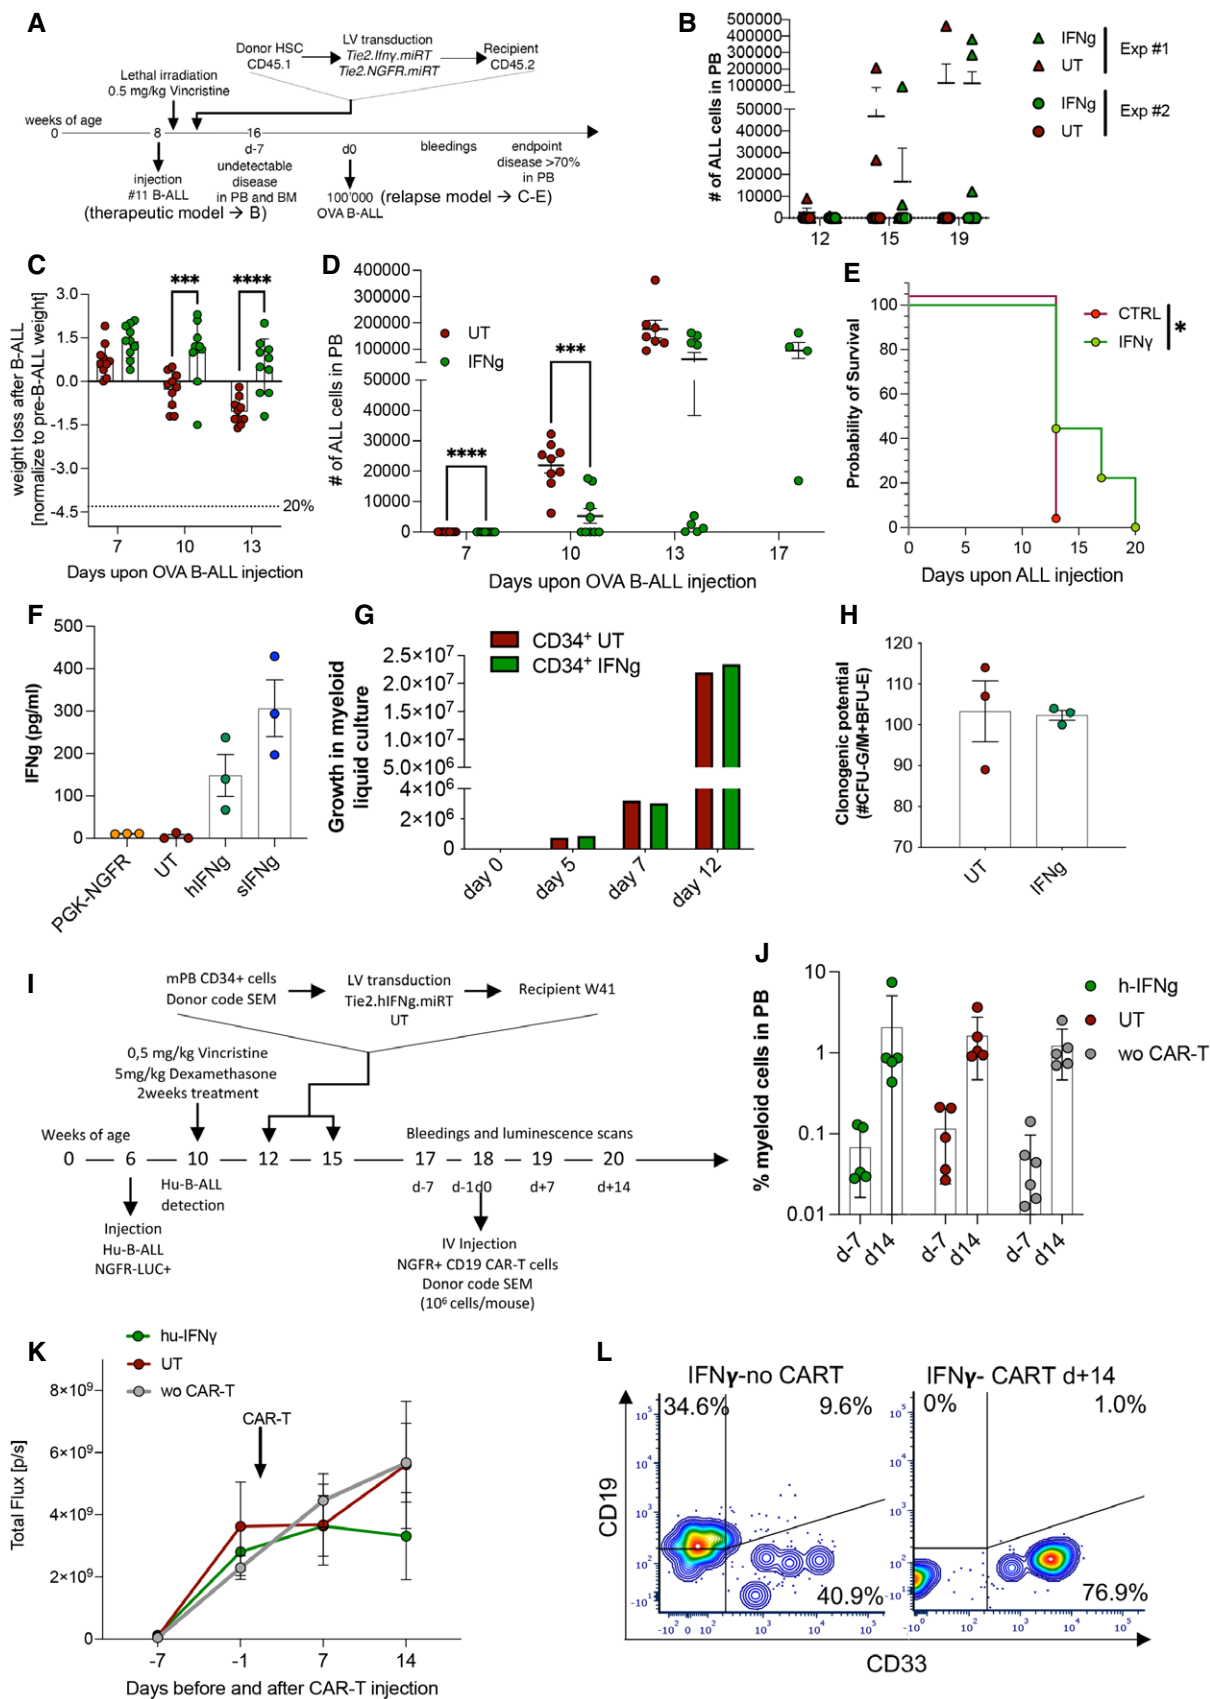

Figure EV3.

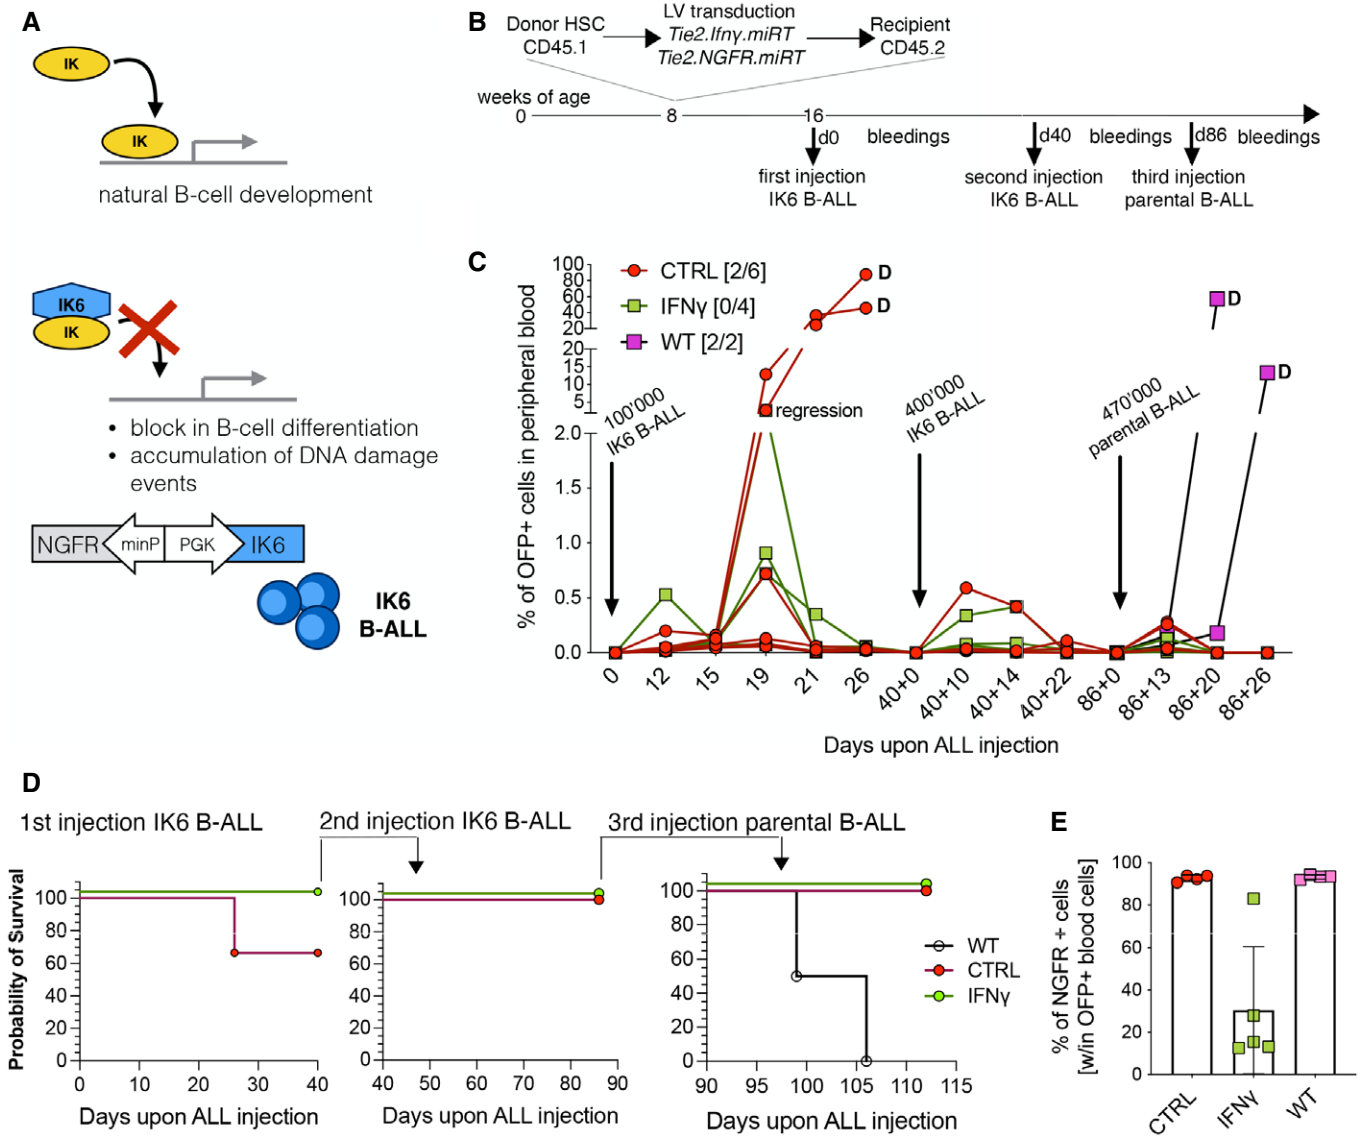

**Figure EV4. IFN- $\gamma$  gene delivery induces antigen loss in IKAROS6 expressing B-ALL.**

A Schematic representation of IKAROS6 activity in leukemia, and genetic modification of the parental B-ALL to induce constitutive expression of the dominant-negative IK6 protein.

B Schematic representation of the experimental outline.

C B-ALL progression in the peripheral blood, measured as the percentage of OFP<sup>+</sup> cells within total white blood cells. CTRL mice engrafted with HSPCs transduced with the Tie2/p.NGFR vector; IFN- $\gamma$  mice engrafted with HSPCs transduced with the Tie2/p.IFN- $\gamma$  vector; WT CTRL, sub-lethally irradiated mice that did not receive prior BM transplantation. The numbers in [brackets] indicate the fraction of mice (over the total number) that developed disease upon primary challenge; differences were not significant by Fisher's exact test. Arrows indicate successive disease challenges, with the indicated B-ALL subline.

D Survival curves of three re-challenges with IK6 B-ALL (challenges #1 and #2) and parental line #8 disease (challenge #3; one experiment, CTRL = 6 mice, IFN- $\gamma$  = 4 mice, WT = 2 mice).

E Expression of NGFR on OFP<sup>+</sup> leukemic cells after the first challenge with IK6 B-ALL (mice from (C), mean  $\pm$  SD).

**Figure EV5. Identification of Tie2-expressing monocytes and non-classical monocytes by scRNAseq analysis.**

- A UMAP highlighting cells expressing the signature of TEMs, based on the transcriptional signature published by Pucci *et al* (2009).
- B Heatmap showing the expression of the genes from the TEM signature within the different myeloid populations defined by our custom signature (see Fig 3C).
- C Mapping of the myeloid cell signatures identified by Witkowski *et al* (2020) onto the myeloid compartment of our leukemic mice. Note that the pro-leukemic mHB-M2 cluster colocalizes with our subset of non-classical monocytes.
- D Representation of the pro-leukemic mHB-M2 cluster across the different experimental conditions. Note that this cluster becomes more represented in the IFN- $\gamma$  group on day 17.
- E Differential expression of mHB-M2 marker genes in the myeloid cells of our treated animals, according to experimental group.



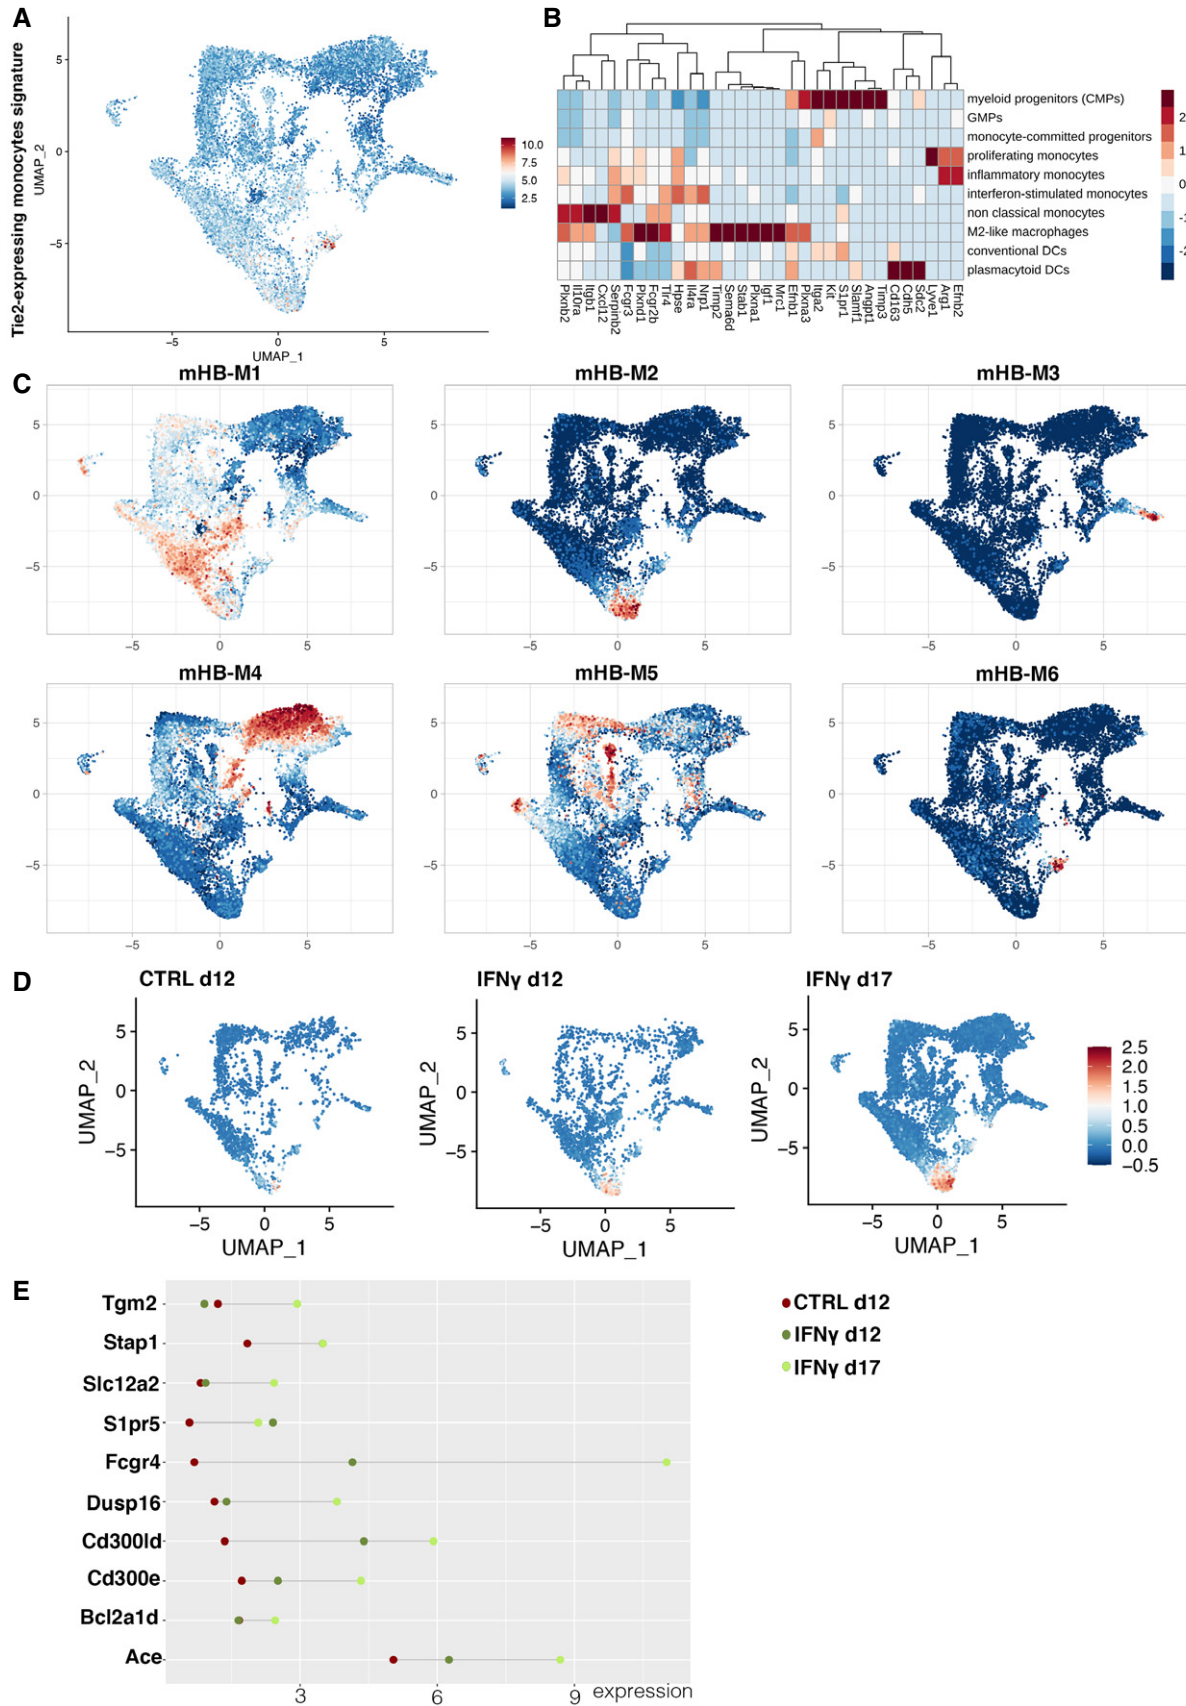

Figure EV5.
